# Supplementary material
Source: publisher site journal article supplement (https://static.cambridge.org/content/id/urn:cambridge.org:id:article:S0033822222000339/resource/name/S0033822222000339supp001.doc)
Supplement: Supplementary file 1 [file S0033822222000339supp001.doc]

**TABLE 1**. Occurrence of *Panthera pardus* in the Pleistocene of Europe and south-west Asia. Locality numbers (Map) correspond to those in Fig. 1.

| **No.** | **Site** | **Age (MIS/kyr)** | **References** |
| --- | --- | --- | --- |
| 1. | Vallonet Cave | 31-29 | Lumley et al. (1988); Moullé (1992); Echassoux (2004); Moullé et al. (2006); Madurell-Malapeira et al. (2014); Brugal et al. (2020) |
| 2. | Parat Cave | 25-22 | Sanchis et al. (2015) |
| 3. | Petralona Cave | 20-17 | Kurtén and Poulianos (1981); Kurtén (1983) |
| 4. | Koněprusy C718 | 19-17 | Fejfar (1961); García and Virgós (2007) |
| 5. | Isernia la Pineta | 17-16 | Sala (2006); Hohenstein et al. (2009); Sauque and Cuenca-Bescós (2013) |
| 6. | Gombasek | 16-14 | Kretzoi (1938); Hemmer (1971) |
| 7. | Mosbach 2 | 15-13 | Soergel (1914); Schmidtgen (1922); Schütt (1940); Kahlke (1961); Hemmer and Schütt (1969) |
| 8. | Valdemino Cave | 15-14 | Sala (1992); Nocchi and Sala (1997); Sauque and Cuenca-Bescós (2013) |
| 9. | Arago Cave | 15-14 | Crégut (1979); Lumley et al. (1984); Hemmer 2003); Moigne et al. (2006); Testu (2006; Testu et al. (2011); Brugal et al. (2020) |
| 10. | Mauer | 15-13 | Soergel (1914); Schmidtgen (1922); Rüger (1928); Schütt (1969a); Schreiber et al. (2007); Wagner et al. (2011) |
| 11. | Soave-Sentiero | 15-13 | Pasa (1947); Bon et al. (1991); Bona and Sardella (2012) |
| 12. | Hundsheim | 15-13 | Freudenberg (1909, 1914); Schmid (1940); Pacher and Rabeder (2016) |
| 13. | Tarkö Rock Shelter | 14-13 | Jánossy (1962, 1969, 1976, 1986); Kahlke et al. (2011) |
| 14. | Nauterie Cave | 14-12 | Clot (1980) |
| 15. | Cerè Cave | 13-12 | Sorbini and Durante Pasa (1974); Kotsakis and Palombo (1979); Ghezzo et al. (2014) |
| 16. | Artenac | 12-10 | Delagnes et al. (1999) |
| 17. | Kudaro 1 Cave | 11-10 | Baryshnikov (2011) |
| 18. | Serbaro di Romagnano | 11-10 | Schmid (1940); Kotsakis and Palombo (1979) |
| 19. | Verzé-Verchizeuil | 11-10 | Argant (1991) |
| 20. | Creswell | 10-9 | Schmid (1940); Stuart (1974) |
| 21. | Azé 1 Cave | 9 | Argant (1991, 2000); Brugal et al. (2020) |
| 22. | Lunel-Viel | 9 | Harlé (1910); Bonifay (1971); Hemmer (1972); Fosse (1996); Brugal et al. (2020) |
| 23. | Monte Sacro | 9 | Kotsakis and Palombo (1979); Kotsakis and Barisone (2008) |
| 24. | Quisisana-Certosa (Capri Island) | 9 | Bataglia (1918); Capasso Barbato and Gliozzi (1995) |
| 25. | Biśnik Cave | 10/9-3 | Marciszak et al. (2011a, 2011b) |
| 26. | Cova Negra | 9-8 | Royo Gómez (1942); Pérez Ripoll (1977); Martínez (1996, 2009); Sanchis et al. (2015) |
| 27. | Orgnac 3 | 9-8 | Aouraghe (1992, 1999); Rivals (2004); Testu (2006); Brugal et al. (2020) |
| 28. | Cau d’En Borràs | 9-7 | Carbonell et al. (1979); Fernández (2004); Sanchis et al. (2015) |
| 29. | Flandin Cave | 8 (300-250) | Moncel et al. (2008) |
| 30. | Bleadon Cavern (Banwell Bone Cave) | 7 | Sanford and Ayshford (1864, 1865); Dawkins and Sandford (1871); Currant and Jacobi (1997, 2001); Schreve (1997); Currant (2004); Turner (2009) |
| 31. | Bolomor Cave | 7 | Sanchis et al. (2015) |
| 32. | Erkenbrechtsweiler | 7 | Koenigswald and Schmidt-Kittler (1972) |
| 33. | Carrière (Gerde) Cave | 7 | Clot (1980) |
| 34. | Pontnewydd Cave | 7 | Stuart (1983); Currant (1984); Currant and Jacobi (2001); Turner (2009) |
| 35. | Repolust Cave | 7 | Mottl (1951); Döppes and Rabeder (1997); Pacher and Rabeder (2016) |
| 36. | Lazaret Cave | 7 | Gagnière (1959); Valensi (1994); Valensi and Abbassi (1998); Valensi (2000); Sharada (2013); Brugal et al. (2020) |
| 37. | La Niche Cave (Montmaurin Caves) | 7 | Tavoso et al. (1990); Crégut-Bonnoure et al. (2010) |
| 38. | Gegant Cave | 7-6 | Viñas and Villalta (1975); Daura et al. (2005); Daura and Subirà (2008); Diez Fernandez-Lomana et al. (2010) |
| 39. | Pajucas Cave | 7-5 | Nolte (1966, 1968); Apellániz and Nolte (1967); Altuna (1967, 1972) |
| 40. | Cova 120 | 7-5 | Prat-Vericat et al. (2021) |
| 41. | Lezetxiki Cave | 7-5 | Altuna (1971, 1972); Cabrera (1984); Falgères et al. (2005); Altuna and Mariezkurrena (2010); Villaluenga et al. (2012a) |
| 42. | Corb Cave | 7-4 | Sarrión (1990; Sanchis et al. (2015) |
| 43. | Cau del Duc d’Ullà | 6 | Estévez (1979) |
| 44. | Romain-la-Roche | 6 | Argant (2010) |
| 45. | Dechen Cave | 6-5e | Diedrich (2013) |
| 46. | Mugharet et-Tabun (Tabun Cave) | 6-5e | Galik et al. (2012) |
| 47. | Muricers Cave | 6-5e | Estévez (1979) |
| 48. | Arlanpe Cave | 6-4 | Arceredillo et al. (2013) |
| 49. | Biedermann Cave | 5e | Adam and Berckhemer (1983) |
| 50 | Burgtonna | 5e | Hemmer (1978) |
| 51. | Camino Cave (Pinilla del Valle) | 5e | Alférez et al. (1982); Arribas et al. (2008); Arsuaga et al. (2012) |
| 52. | Grimaldi Cave | 5e | Boule (1910, 1919); Lumley-Woodyear (1969); Bulgarelli (1974) |
| 53. | Kálmán Lambrecht Cave | 5e | Jánossy (1953, 1958, 1963, 1986); Vérter (1965) |
| 54. | Karaïn Cave | 5e | Otte et al. (1996); Rivals (2004); Testu (2006) |
| 55. | Taubach | 5e | Freudenberg (1914); Schmid (1940); Schütt (1949); Kahlke (1958, 1961); Hemmer (1971, 1977); Dusseldorp (2009) |
| 56. | Ossa Cave (Zandobbio) | 5e | Vialli (1957); Kotsakis and Palombo (1979); Bona (2006) |
| 57. | Montignoso | 5e | Rustioni et al. (1999); Petronio et al. (2011) |
| 58. | Observatoire Cave | 5e | Lartet (1867); Bourgouignat (1879); Boule and Villeneuve (1927); Kotsakis and Palombo (1979); Testu (2006) |
| 59. | Dziadowa Skała Cave, layer 3a | 5e | this paper |
| 60. | Artazu VII Cave | 5c | Bilbao (2018); Castaños et al. (2019) |
| 61. | Valdavara 3 | 5a-d | Alonso et al. (2014) |
| 62. | Blanot 2 Cave | 5 | Argant (1991) |
| 63. | Ciota Ciara Cave | 5 | Berto et al. (2016) |
| 64. | Masque Cave | 5 | Crégut-Bonnoure et al. (2011) |
| 65. | Abauntz Cave | 5-4 | Mazo et al. (2011, 2012); Utrilla et al. (2015) |
| 66. | Berlin-Niederlehme | 5-4 | Fischer (2000) |
| 67 | Biache-Saint-Vaast | 5-4 | Silva et al. (2001); Dusseldorp (2009) |
| 68. | Carigüela Cave | 5-4 | Bouchud (1969); Ruiz Bustos and García-Sánchez (1977) |
| 69. | Devil’s Tower Rock Shelter | 5-4 | Bate (1928); Currant (2000); Diez Fernandez-Lomana et al. (2010) |
| 70. | Genista Cave | 5-4 | Busk (1877); Schmid (1940); Currant (2000); Baryshnikov (2011) |
| 71. | Krapina | 5-4 | Malez (1970); Malez and Pepeonik (1970) |
| 72. | Subalyuk Cave | 5-4 | Jánossy (1986) |
| 73. | Vanguard Cave | 5-4 | Cáceres (2002); Stringer et al. (2008) |
| 74. | Villa Spinola | 5-4 | Kotsakis and Palombo (1979) |
| 75. | Naciekowa Cave | 5-3 | Marciszak et al. (2016, 2020) |
| 76. | Wschodnia Cave | 5-3 | this paper |
| 77. | Azykh Cave | 5-3 | Baryshnikov (2011) |
| 78. | Abrigo de Olha | 5-3 | Passemard (1920a, 1920b, 1921b, 1924, 1936); Barandiarán (1967); Altuna (1966, 1972) |
| 79. | Akhstyrskaya Cave | 5-3 | Baryshnikov (2011) |
| 80. | Manga Larga Cave | 5-3 | Cardoso and Regala (2006) |
| 81. | Cavillon Cave | 5-3 | Battaglia (1918) |
| 82. | Bayol Cave | 5-3 | Paulus (1947) |
| 83. | Bouichéta Cave | 5-3 | Garrigou (1866) |
| 84. | Broion Cave | 5-3 | Bon et al. (1991) |
| 85. | Bronze Cave in Tsutskhvati Cave Complex | 5-3 | Rivals and Arellano (2010); Baryshnikov (2011) |
| 86. | Brühl | 5-3 | Diedrich (2013) |
| 87. | Bucca del Tasso | 5-3 | Fabiani (1923) |
| 88. | Bukovac Cave | 5-3 | Kormos (1912); Mottl (1938) |
| 89. | Campagna Cave | 5-3 | Costa (1886) |
| 90. | Campana del Piñar Cave | 5-3 | Koby and Spahni (1956) |
| 91. | Casares Cave | 5-3 | Altuna (1972, 1973); Delibes (1972); Arribas et al. (2008); Diez Fernandez-Lomana et al. (2010) |
| 92. | Chaude au Bois du Roc Cave | 5-3 | Tournepiche (2001) |
| 93. | El Mirón Cave | 5-3 | Marín-Arroyo (2009) |
| 94. | Monte Cucco Cave | 5-3 | Simonelli (1916) |
| 95. | Coscobilo Cave | 5-3 | Ruiz de Gaona (1945, 1952, 1958); Maluquer de Motes (1957); Barandiarán (1967); Altuna (1972); Mariezkurrena (2011) |
| 96. | Crvena Stijena | 5-3 | Basler et al. (1966) |
| 97. | La Ermita Cave | 5-3 | Delibes (1972); Alférez et al. (1982) |
| 98. | Gorham’s Cave | 5-3 | Currant (2000); Carrión et al. (2008); Stringer et al. (2008); Rodríguez et al. (2010) |
| 99. | Bucca della Iena | 5-3 | Pitti and Tozzi (1971); Petronio et al. (2011) |
| 100. | Ijzendoorn | 5-3 | Bosscha Erdbrink (1986, 1988) |
| 101. | Kalamakia | 5-3 | Darlas (2007) |
| 102. | Mollet 1 | 5-3 | Maroto et al. (1987) |
| 103. | Noisetier Cave | 5-3 | Mourre et al. (2009) |
| 104. | Pinarillo 1 Cave | 5-3 | Arribas (1997); Arribas et al. (2008) |
| 105. | Scladina Cave | 5-3 | Simonet (1992); Patou-Mathis (1998); Döppes et al. (2008) |
| 106. | Sima de las Palomas | 5-3 | García et al. (1997); Walker (2001); Diez Fernandez-Lomana et al. (2010); Walker et al. (2012) |
| 107. | Smolućka Cave | 5-3 | Dimitrijević (1991) |
| 108. | S’Espasa Cave | 5-3 | Estévez (1975-1976) |
| 109. | Valdegoba Cave | 5-3 | Díez et al. (1989); Arribas et al. (1997); Quam et al. (2001) |
| 110. | Veternica Cave | 5-3 | Malez (1963); Miracle and Brajkovič (2010) |
| 111. | Balmes Cave (Villereversure) | 5-3 | Lortet and Chantre (1872); Chantre (1901); Dubois and Stehlin (1933) |
| 112. | L’Herm Cave | 5-3 | Harlé (1899); Boule (1927); Schmid (1940); Dufour (1989); Clot and Duranthon (1990) |
| 113. | Wildkirchli | 5-3 | Bächler (1907, 1912, 1936, 1940); Schmid (1940); Diedrich (2013); Pacher and Rabeder (2016) |
| 114. | Oliveira Cave | 5-3 | Zilhão et al. (2010b) |
| 115. | Pisana Stina | 5-3 | Malez (1961); Malez and Pepeonik (1969); Malez et al. (1979) |
| 116. | Treugolnaya Cave | 5-3 | Baryshnikov (2011) |
| 117. | Vallescure Cave | 5-3 | Gagniere and Germand (1932) |
| 118. | Velika Pećina | 5-3 | Malez (1986) |
| 119. | Saint Juan Berchmans Cave (La Blanca Cave) | 5-3 | Schlosser (1923); Yravedra (2008) |
| 120. | Châteaubourg (aux Ours) Cave | 4 | Pautret-Homerville et al. (2011) |
| 121. | Obok Wschodniej Cave | 4-3 | this paper |
| 122. | Gruta de Dine | 4-3 | Cardoso (1993, 1995, 1996); Yravedra (2003) |
| 123. | Carnello | 4-3 | Petronio et al. (2011) |
| 124. | Castelcivita Cave | 4-3 | Caloi et al. (1986); Sauque and Cuenca-Bescós (2013) |
| 125. | Castelmouly Cave | 4-3 | Phillipe (1852) |
| 126. | Cau de Coçes | 4-3 | Estévez (1979; Yravedra (2008) |
| 127. | Cava Cave | 4-3 | Petronio et al. (2011) |
| 128. | La Chaise Cave | 4-3 | Dufour (1989) |
| 129. | Les Pêcheurs | 4-3 | Balme (1984); Deaujard (2008); Moncel et al. (2008); Fourvel et al. (2014) |
| 130. | Adaouste Cave | 4-3 | Defleur et al. (1998) |
| 131. | Arene Candide Cave | 4-3 | Bietti and Molari (1994); Cassoli and Tagliacozzo (1991, 1994); Sommer and Benecke (2006); Masseti et al. (2012) |
| 132. | Astigarraga Cave | 4-3 | Castaños (2010); Villaluenga et al. (2012a) |
| 133. | Aubert Cave | 4-3 | Dubois and Stehlin (1933) |
| 134. | Avenc de Joan Guitón | 4-3 | Sanchis et al. (2015) |
| 135. | Baio Cave | 4-3 | Altuna and Mariezkurrena (2010) |
| 136. | Balauzière Cave | 4-3 | Paulus (1947; Testu (2006) |
| 137. | Chilchi Cave | 4-3 | Andrist et al. (1964); Koby (1964) |
| 138. | Chokier Cave | 4-3 | Dubois and Stehlin (1933); Schmid (1940) |
| 139. | Cotencher Cave | 4-3 | Stehlin and Dubois (1933); Schmid (1940) |
| 140. | Coupe-Gorge Cave (Montmaurin Caves) | 4-3 | Guadelli (1990) |
| 141. | Crouzade Cave | 4-3 | Testu (2006); Henry-Gambier and Sacchi (2008) |
| 142. | Cucigliana Cave (Monti Pisani) | 4-3 | Acconci (1880a, 1880b); Mochi (1911); Del Campana (1914); Farina (2010, 2011); Masseti et al. (2012); Farina (2013) |
| 143. | Dash Salakhly Cave | 4-3 | Lioubine (1989); Baryshnikov (2011) |
| 144. | Drachenloch Cave | 4-3 | Bächler (1940); Pacher and Rabeder (2016) |
| 145. | Einhorn Cave | 4-3 | Struckmann (1884); Hemmer and Schütt (1970) |
| 146. | Engihoul | 4-3 | Fraipont (1923); Boursiac (1939) |
| 147. | Engis Caves | 4-3 | Schmerling (1834) |
| 148. | Enfants Cave | 4-3 | Testu (2006) |
| 149. | Equi Cave | 4-3 | Regalia (1911); De Stefani (1917); Del Campana (1954); Ghezzo (2014); Ghezzo et al. (2014); Ghezzo and Rook (2015) |
| 150. | Escoural Cave | 4-3 | Cardoso (1993, 1996); Yravedra (2003); Cardoso (2006) |
| 151. | Estelas | 4-3 | Dufour (1989) |
| 152. | Étrigny | 4-3 | Argant (1991) |
| 153. | Ettingen | 4-3 | Koenigswald et al. (2006); Sauqué and Cuenca-Bescós (2013) |
| 154. | Fate Cave | 4-3 | Issel (1878a, 1878b, 1892); Schmid (1940) |
| 155. | Forbes’ Quarry | 4-3 | Diez Fernandez-Lomana et al. (2010) |
| 156. | Fossellone Cave | 4-3 | Del Campana (1914); Mallegni (1992) |
| 157. | Fumane Cave | 4-3 | Cassoli and Tagliacozzo (1991); Fiore et al. (2004); Tagliacozzo et al. (2013) |
| 158. | Fünffenster Cave | 4-3 | Fladerer (1997c) |
| 159. | Geinsheim | 4-3 | Koenigswald et al. (2006) |
| 160. | Glozel Cave | 4-3 | Depéret (1928) |
| 161. | Goffontaine Cave | 4-3 | Dubois and Stehlin (1933); Schmid (1940) |
| 162. | Gouffre Junqua | 4-3 | Clot and Evin (1986); Clot and Duranthon (1990) |
| 163. | Groß-Rohrheim | 4-3 | Diedrich (2013) |
| 164. | Höhlenstein-Stadel | 4-3 | Gamble (1999) |
| 165. | Imanolen Arrobia | 4-3 | Castaños et al. (2016) |
| 166. | Ingarano Cave | 4-3 | Petronio (1998, 2006); Petronio et al. (2006); Sauque and Cuenca-Bescós (2013) |
| 167. | Iruaxpe 1 Cave | 4-3 | Mariezkurrena (1987) |
| 168. | Aghitu-3 Cave | 4-3 | Bertacchi et al. (2020) |
| 169. | Kitseli Pothole | 4-3 | Tsoukala et al. (2006b) |
| 170. | Kostelík | 4-3 | Schmid (1940) |
| 171. | Kudaro 3 Cave | 4-3 | Baryshnikov (2011) |
| 172. | Lampertheim | 4-3 | Diedrich (2013) |
| 173. | Lestélas Cave | 4-3 | Dubois and Stehlin (1933) |
| 174. | Pastore Cave (Livrea Cave) | 4-3 | Issel (1892); Del Campana (1914) |
| 175. | Gabasa 1 (Los Moros de Gabasa 1) | 4-3 | Blasco (1997); Blasco Sancho and Montes Ramirez (1997); Diez Fernandez-Lomana et al. (2010); Utrilla et al. (2010) |
| 176. | Los Rincones Cave | 4-3 | Sauqué and Cuenca-Bescós (2013); Sauqué et al. (2014a, 2014b, 2014c) |
| 177. | Luegloch | 4-3 | Fladerer (1997d) |
| 178. | cave in the Liège area | 4-3 | Schmerling (1833, 1834) |
| 179. | Maasvlakte 2 | 4-3 | Bruijn and Bruijn (2017; Schinkel (2019) |
| 180. | Madonna dell’Arma Cave | 4-3 | Valensi and Pstabi (2004; Sauque and Cuenca-Bescós (2013) |
| 181. | Makarovec Cave | 4-3 | Garevski (1969) |
| 182. | Malarnaud Cave | 4-3 | Filhol (1889); Boul (1910); Astre (1927); Dufour (1989) |
| 183. | Maren Kessel | 4-3 | Bosscha Erdbrink (1986, 1988) |
| 184. | Massat Cave | 4-3 | Dubois and Stehlin (1933) |
| 185. | Bear Cave in Tsutskhvati Cave Complex | 4-3 | Baryshnikov (2011) |
| 186. | Ménieux Cave | 4-3 | Dubois and Stehlin (1933) |
| 187. | Meravelles Cave | 4-3 | Sanchis et al. (2015) |
| 188. | Merkenstein Cave | 4-3 | Wettstein and Mühlhofer (1938); Nagel (1997); Pacher and Rabeder (2016) |
| 189. | Mezmaiskaya Cave | 4-3 | Baryshnikov et al. (1996); Baryshnikov (2011) |
| 190. | Mialet Cave | 4-3 | Gervais (1867); Stehlin (1935); Schmid (1940) |
| 191. | Moula-Guercy | 4-3 | Valensi et al. (2012) |
| 192. | Mračna Cave | 4-3 | Poljak (1914); Malez (1963) |
| 193. | Nabrigas Cave | 4-3 | Dubois and Stehlin (1933); Schmid (1940) |
| 194. | Néron Cave | 4-3 | Koby (1964) |
| 195. | Ochsenhalt Cave | 4-3 | Döppes and Rabeder (1997); Rabeder (2003; Geyer (2007) |
| 196. | All’Onda Cave | 4-3 | Petronio et al. (2011) |
| 197. | Pape Cave (Pope’s Cave) | 4-3 | Piette (1894) |
| 198. | Oyalkoba Cave | 4-3 | Castaños (1987) |
| 199. | Peters Cave | 4-3 | Hörmann (1933); Schmid (1940) |
| 200. | Picon Cave | 4-3 | Harlé (1910); Dubois and Stehlin (1933 |
| 201. | Po River | 4-3 | Sabol et al. (2017) |
| 202. | Pocala Cave | 4-3 | Battaglia (1921); Leonardi (1935); Anelli (1954); Bon et al. (1991) |
| 203. | Pod Pečino Cave | 4-3 | Pavšic and Turk (1989) |
| 204. | Poggio Cave | 4-3 | Sala (1980) |
| 205. | Portel-Ouest Cave | 4-3 | Gardeisen (1994, 1999); Testu (2006) |
| 206. | Praileaitz 1 Cave | 4-3 | Castaños (2010); Castaños and Castaños (2017) |
| 207. | Prince Cave | 4-3 | Boule (1906, 1919) |
| 208. | Proval Cave | 4-3 | this paper |
| 209. | Pryima 1 Cave | 4-3 | this paper |
| 210. | Ranggiloch | 4-3 | Andrist et al. (1964); Koby (1964) |
| 211. | Riparo i Grottoni | 4-3 | Petronio et al. (2011) |
| 212. | Riparo Tagliente | 4-3 | Thun Hohenstein (2006); Sauque and Cuenca-Bescós (2013) |
| 213. | Roc-Traücat | 4-3 | Dufour (1989) |
| 214. | Saint Agostino di Gaeta Cave | 4-3 | Tozzi (1970); Kotsakis and Palombo (1979); Petronio et al. (2011) |
| 215. | Saint-Michel Cave | 4-3 | Clot and Duranthon (1990) |
| 216. | San Bernardino Cave | 4-3 | Cassoli and Tagliacozzo (1994); Sauque and Cuenca-Bescós (2013) |
| 217. | Sambughetto Cave (Valstrona) | 4-3 | Maviglia (1952); Venzo (1954); Kotsakis and Palombo (1979) |
| 218. | Santa Lucia Superiore | 4-3 | Valensi and Pstabi (2004); Sauque and Cuenca-Bescós (2013) |
| 219. | Santi Cave | 4-3 | Lanfredini et al. (2008) |
| 220. | Schnurenloch | 4-3 | Andrist et al. (1964); Koby (1964) |
| 221. | Spalten Cave | 4-3 | Pacher and Rabeder (2016) |
| 222. | Spritsail Tor Cave | 4-3 | Schmid (1940) |
| 223. | Teufelsbrücke | 4-3 | Musil (1980); Hedges et al. (1998); Koenigswald et al. (2006) |
| 224. | Torrejones Cave | 4-3 | Arribas (1997); Arribas et al. (1997, 2008) |
| 225. | Trois Frères Cave | 4-3 | Fraipont (1923); Boursiac (1939) |
| 226. | Trou Reuviau | 4-3 | Dubois and Stehlin (1933) |
| 227. | Tropfstein Cave (Kugelstein Cave 2) | 4-3 | Fladerer and Frank (1997); Döppes (2001) |
| 228. | Turská Maštal | 4-3 | Woldřich (1893); Schmid (1940) |
| 229. | Unikoté Cave | 4-3 | Michel (2005) |
| 230. | Urtiaga Cave | 4-3 | Altuna (1970, 1971); Castaños (2005) |
| 231. | Valle Radice | 4-3 | Petronio et al. (2011) |
| 232. | Vence (Mars) Cave | 4-3 | Lartet (1867); Boule (1906); Schmid (1940) |
| 233. | Upper Cave in Tsutskhvati Cave Complex | 4-3 | Baryshnikov (2011) |
| 234. | Verrierie | 4-3 | Gagiuere and Marceilin (1951) |
| 235. | Vypustek Cave | 4-3 | Liebe (1879); Kříž (1893); Schmid (1940) |
| 236. | Zafarraya Cave | 4-3 | Geraads (1995); Barroso et al. (2003, 2006) |
| 237. | Zoolithen Cave | 4-3 | Cuvier (1825); Schmid (1940); Groiss (1979); Grois (2002); Hilpert et al. (2005); Diedrich (2012, 2014) |
| 238. | Furninha Cave | 4-3 | Harlé (1909, 1910b); Cardoso (1993, 1996); Brugal (2010); Brugal et al. (2012) |
| 239. | Hortus Cave | 4-3 (70-60) | Pillard (1972); Testu (2006) |
| 240. | Aguilón P-7 Cave | 3 | Cuenca-Bescós et al. (2010b); Sauqué et al. (2014d) |
| 241. | Asprochaliko | 3 | Bailey et al. (1983) |
| 242. | Axlor Cave | 3 | Altuna (1980, 1994); Castaños (1987, 2005) |
| 243. | Šalitrena Pećina | 3 (43-33) | Marín-Arroyo and Mihailović (2017) |
| 244. | Gruta Nova da Columbeira | 3 | Roche (1971, 1972) |
| 245. | Aurensan | 3 | Dufour (1989) |
| 246. | Baumman’s Cave | 3 | Blasius (1894, 1898a, 1898b, 1900, 1902); Schütt (1968, 1969); Diedrich (2013a, 2013b, 2013c) |
| 247. | Cala Cave | 3 | Masseti et al. (2012) |
| 248. | Capriolo Cave | 3 | Pitti and Tozzi (1971); Caloi et al. (1994) |
| 249. | Chauvet Cave | 3 | Fosse (2003); Philippe and Fosse (2003) |
| 250. | Jaurens Cave | 3 | Guérin et al. (1979); Ballesio (1980) |
| 251. | Llonin Cave | 3 | Sanchis et al. (2019) |
| 252. | Divje babe | 3 | Toškan (2007) |
| 253. | Šipka Cave | 3 | Musil (1965, 2018) |
| 254. | Švédův stůl Cave | 3 | Schmid (1940); Musil (1980) |
| 255. | Sirgenstein Cave | 3 (60-30) | Koken (1909); Schmidt (1912) |
| 256. | Große Bald Cave | 3 (60-30) | Mottl (1953); Döppes and Rabeder (1997); Pacher and Rabeder (2016) |
| 257. | Große Peggauerwand Cave | 3 (60-30) | Fladerer (1997a); Döppes and Rabeder (1997); Koenigswald et al. (2006) |
| 258. | Holzinger Cave | 3 (60-30) | Fladerer (1997b); Döppes and Rabeder (1997); Koenigswald et al. (2006) |
| 259. | Prado Vargas Cave | 3 (50-45) | Navazo et al. (2005); Arceredillo (2010) |
| 260. | Abric Romaní | 3 (50-44) | Cáceres et al. (1993, 1998); Cáceres (2002) |
| 261. | Bacho Kiro Cave | 3 (50-40) | Wiszniowska (1982) |
| 262. | Eirós Cave | 3 (50-40) | De Lombera-Hermida et al. (2014) |
| 263. | Güelga Cave | 3 (48-45) | Menéndez et al. (2014) |
| 264. | Torca del León | 3 (46-43) | Álvarez-Lao et al. (2020) |
| 265. | Radochowska Cave | 3 (43-42) | Marciszak et al. (2016, 2020) |
| 266. | Atxuri Cave | 3 (50-35) | Altuna (1972); Castaños (1987) |
| 267. | Llonín Cave | 3 (50-35) | Fortea et al. (1992, 1995, 1999); De la Rasilla and Santamaría (2011, 2012) |
| 268. | Ermitons Cave | 3 (50-33.1) | Estévez (1979); Maroto (1993) |
| 269. | Loutra Almopias (Arideas) Cave | 3 (45-37) | Tsoukala et al. (2006a); Nagel et al. (2019) |
| 270. | Búho Cave | 3 (44.5-32.5) | Molero et al. (1979, 1989); Íñigo et al. (1998); Arribas et al. (2008); Sala et al. (2011, 2012) |
| 271. | Vjetrenica Cave | 3 (40-29) | Malez and Pepeonik (1970); Malez (1985); Miculinič (2012) |
| 272. | Isturitz Cave | 3 (40-29) | Passemard (1913, 1921b, 1924, 1944); Saint-Perier (1930, 1936); Bouchud (1951b, 1952); Saint-Perier and Saint-Perier (1952); Saint-Perier (1965; Altuna 1972) |
| 273. | Arrillor Cave | 3 (40-37) | Castaños (1987, 2005) |
| 274. | Allekoaitze Cave | 3 (36-34) | Altuna and Mariezkurrena (2011); Corral (2012); Altuna and Mariezkurrena (2013) |
| 275. | Jou Puerta Cave | 3 (36.6-30.2) | Álvarez-Laó (2014); Sanchis et al. (2015) |
| 276. | Milano Cave | 3 (35-31) | Meloro et al. (2006) |
| 277. | Předmostí | 3 (33-29) | Musil (1994, 2008, 2018) |
| 278. | Pavlov | 3 (33-29) | Musil (2003, 2018) |
| 279. | Figueira Brava Cave | 3 (32-29) | Cardoso (1993, 1996); Yravedra (2003) |
| 280. | Gruta de Salemas | 3 (31-29) | Antunes et al. (1989); Cardoso (1993, 1996); Yravedra (2003); Diez Fernandez-Lomana et al. (2010) |
| 281. | Caverna degli Orsi | 3-2 | Berto et al. (2011); Berto and Rubinato (2013) |
| 282. | Tournal à Bize Cave | 3-2 | Patou-Mathis (1994) |
| 283. | Amalda Cave | 3-2 | Klein and Cruz Uribe (1985); Altuna (1990, 1992); Altuna and Mariezkurrena (2010); Yravedra (2010a) |
| 284. | Calaveres Cave | 3-2 (50-20) | Aparicio et al. (1982); Sanchis et al. (2015) |
| 285. | Racó del Duc 1 Cave | 3-2 (50-20) | Sanchis et al. (2015); Sauqué and Sanchis (2017) |
| 286. | Horadada Cave (Azuébar) | 3-2 (50-20) | Sarrión (1984); Fernández (2004) |
| 287. | Terrasses de la Riera dels Canyars | 3-2 (43-26) | Daura et al. (2013); Rosado-Méndez et al. (2015) |
| 288. | Pego do Diabo Cave | 3-2 (43-26) | Valente (2004a, 2004b); Zilhão et al. (2010a) |
| 289. | Covacho de Arenillas | 3-2 (43-26) | Bohigas and Muñoz (2002); Rasines del Río et al. (2011) |
| 290. | Caldeirão Cave | 3-2 (30-17) | Cardoso (1993, 1996); Davis (2002); Cardoso and Regala (2006) |
| 291. | Cuco Cave | 3-2 (43-26) | Castaños and Castaños (2007); Rasines del Río et al. (2011) |
| 292. | Ekain Cave | 3-2 (43-26) | Altuna and Mariezkurrena (1984); Altuna (1994); Altuna and Mariezkurrena (2010); Villaluenga et al. (2012b) |
| 293. | El Salt | 3-2 (43-26) | Sanchis et al. (2015) |
| 294. | Foradada Cave | 3-2 (43-26) | Pantoja et al. (2011); Sanchis et al. (2015) |
| 295. | Abric del Pastor | 3-2 (43-26) | Sanchis et al. (2015) |
| 296. | Hornos de la Peña Cave | 3-2 (43-26) | Harlé (1908, 1911); Obermaier (1925); Barandiarán and Sonneville (1964); Altuna (1972); Yravedra (2010b) |
| 297. | Malladetes Cave | 3-2 (43-26) | Sanchis et al. (2015) |
| 298. | Apidima Cave | 3-2 (45-20) | Tsoukala (1999) |
| 299. | Klisoura Cave | 3-2 (35-25) | Koumouzelis et al. (2001) |
| 300. | Diros (Dyros) Cave | 3-2 (30-28) | Bassiakos (1993); Georgiadou-Dikaioulia et al. (2002) |
| 301. | Aitzbitarte 3 Cave | 3-2 (33-17) | Altuna and Mariezkurrena (2011) |
| 302. | Arbreda Cave | 3-2 (33-17) | Estévez (1987); Nadal et al. (2002; Rivals (2004) |
| 303. | Castillo Cave | 3-1 (40-12) | Cabrera (1984); Altuna (1990); Dari (1999); Quesada (2006); Bernaldo de Quirós et al. (2015) |
| 304. | Bolinkoba Cave | 3-1 (33-12) | Castaños (1983, 1987); Yravedra (2007) |
| 305. | Morín Cave | 3-1 (33-12) | Vega del Sella (1921); Carballo (1923); Altuna (1971); González Echegaray and Freeman (1971); Castaños (1983); Altuna (1994); Marín-Arroyo (2009) |
| 306. | Mugharet el-Wad (El Wad Cave) | 3-1 (30-11) | Galik et al. (2012) |
| 307. | Casa da Moura Cave | 2 (27-25) | Cardoso (1993); Valente (2004a); Cardoso and Regala (2006) |
| 308. | Tritons Cave | 2 (26-24) | Micó et al. (2020) |
| 309. | Fontaínhas Cave | 2 (23.5-22.5) | Harlé (1910b, 1912); Cardoso (1993, 1996) |
| 310. | Aintzulo Cave | 2 (22-21) | Altuna and Mariezkurrena (2011, 2013) |
| 311. | Caldas Cave | 2 (22-17) | Corchón (2014) |
| 312. | Tarté Cave | 2 (25-15) | Dubois and Stehlin (1933); Dufour (1989); Clot and Duranthon (1990) |
| 313. | Coraü (Saucet) Cave | 2 (25-15) | Dubois and Stehlin (1933); Dufour (1989); Clot and Duranthon (1990) |
| 314. | Gargas | 2 (25-15) | Clot and Duranthon (1990) |
| 315. | Gourdan | 2 (20-15) | Piette (1875) |
| 316. | Oillascoa Cave | 2 (18.8-18.5) | Clot and Duranthon (1990) |
| 317. | Triagalnata Cave | 2 (18.5-15) | Spassov and Raychev (1997) |
| 318. | Vraona Cave | 2-1 (25-7) | Symeonidis et al. (1977); Nagel (1995, 1999) |
| 319. | El Juyo Cave | 2-1 (17-12) | Castaños (1983); Klein and Cruz Uribe (1985) |
| 320. | Hayonim Cave | 2-1 (15-11.5) | Galik et al. (2012) |
| 321. | Salabiya 1 | 2-1 (15-11.5) | Galik et al. (2012) |
| 322. | La Riera Cave | 1 (12.5-10) | Vega del Sella (1930); Fraga (1958); Altuna (1972); Álvarez-Laó (2003) |
| 323. | Göbekli Tepe | 1 (12-11) | Galik et al. (2012) |
| 324. | Ilıpınar | 1 (8-6.5) | Galik et al. (2012) |
| 325. | Çatal Höyük | 1 (6.5-5.5) | Hodder (2006); Galik et al. (2012) |
| 326. | Ulucak Höyük | 1 (5-4) | Galik et al. (2012) |
| 327. | Ras Shamra | 1 (4.0-3.5) | Clutton-Brock (1979; Galik et al. (2012) |
| 328. | Bastam | 1 (4-3.5) | Galik et al. (2012) |
| 329. | Çukuriçi Höyük | 1 (4-3.5) | Galik et al. (2012) |
| 330. | Boğazköy-Hattusa | 1 (3.5-3.2) | Galik et al. (2012) |
| 331. | Troia | 1 (3.5-3.2) | Uerpmann (1992); Galik et al. (2012) |
| 332. | Verkhniye Panivsty | 1 (2.7-2.3) | Vinokur and Khotun (1965); Krakhmalnaya (1999) |
| 333. | Zalesie | 1 (2.7-2.3) | Zhuravlev (1983) |
| 334. | Olviya | 1 (3-2) | Pidoplichko (1951, 1956); Topachevskij (1956); Bibikova (1958); Zhuravlev (1983, 1993, 1999) |
| 335. | Segesd-Pékóföld | 1 (0.7-0.6) | Bartosiewicz (2001, 2015) |

**References**

Acconci L. 1880a. Di una caverna fossilifera scoptera a Cucigliana e di alcuni resti fossili appartenenti ai generi Hyaena a Felis. Atti Societa Toscana Science Naturale Proceedings Verbale 2:30–32.

Acconci L. 1880b. Sopra una caverna fossilifera scoperta a Cucigliana (Monti Pisani). Atti Societa Toscana Science Naturale Proceedings Verbale 5:109–166.

Alférez F, Molero G, Maldonado E, Bustos V, Brea P., Buitrago AM. 1982. Descubrimiento del primer yacimiento cuaternario (Riss-Würm) de vertebrados con restos humanos en la provincia de Madrid (Pinilla del Valle). Colpa 37:15–32.

Alonso S, Vaquero M, Ameijenda A, 2014. La Cova de Valdavara y Valdavara 3 (Becerreá, Lugo). In: Sala R, Carbonell E, Bermúdez de Castro JM, Arsuaga JL. (Eds.), Los cazadores recolectores del Pleistoceno y del Holoceno en Iberia y el Estrecho de Gibraltar. Estado actual del conocimiento del registro arqueológico. Universidad de Burgos y Fundación Atapuerca, pp. 31–33.

Altuna J. 1966. Mamíferos de clima frío en los yacimientos prehistóricos del País Vasco. Munibe 18:65–68.

Altuna J. 1967. Cuevas sepulcrales de Vizcaya. Estudio paleontológico de los mamíferos hallados en los estratos asqueológicos. Munibe 19:227–230.

Altuna J. 1971. Los mamíferos del yacimiento prehistórico de Morín (Santander). In: Cueva Morín. Excavaciones 1966-1968. Publicaciones del Patronato de las cuevas prehistóricas de la provincia de Santander 6:367–399.

Altuna J. 1971. El reno en el Würm de la Peninsula Iberica. Munibe 23(1):71–90.

Altuna J. 1972. Fauna de mamíferos de los yacimientos prehistóricos de Guipúzcoa, con catalogo de los mamíferos cuaternarios del Cantábrico y del Pirineo occidental. Munibe 24:1–464.

Altuna J. 1973. Fauna de mamíferos del yacimiento prehistorico de Los Casares (Guadalajara). In: Barandiarán JM. (Ed.), La Cueva de los Casares, Ministerio de Educación y Ciencia, Madrid, pp. 97–116.

Altuna J. 1980. Fauna de Axlor. Campaña de 1971. Obras Completas 17:273–279.

Altuna J. 1990. Caza y alimentación procedente de macromamíferos durante el Paleolítico de Amalda. In: Altuna J, Baldeón A, Mariezkurrena R. (Eds), La cueva de Amalda (P. Vasco). Ocupaciones paleolíticas y postpaleolíticas. Sociedad de Estudios Vascos B4:149–192.

Altuna J. 1992. El medio ambiente durante el Pleistoceno Superior en la región Cantábrica con referencia especial a sus faunas de mamíferos. Munibe Antropologia-Arkeologia 43:13–29.

Altuna J. 1994. Les macromammifères du Paléolitique supérieur ancien dans la region Cantabrique. In: Bernaldo de Quirós F. (Ed.), El cuadro cronológico del Paleolítico superior inicial. Museo y centro de investigación de Altamira 13:188–197.

Altuna J, Mariezkurrena K. 1984. Bases de subsistencia de origen animal de los pobladores de Ekain. In: Altuna J, Merino JM. (Eds.), El yacimiento prehistórico de la cueva de Ekain (Deba, Gipuzkoa). Sociedad de Estudios Vascos, San Sebastián, pp. 211–280.

Altuna J, Mariezkurrena K. 2010. Tafocenosis en yacimientos del Pais Vasco con predominio de grandes carnivoros. Consideraciones sobre el yacimiento de Amalda Zona Arqueológica 13:215–228.

Altuna J, Mariezkurrena K. 2013. Cráneos de pantera en Allekoaitze (Ataun) y Aintzulo (Errezil) (Guipuzkoa). Kobie Serie Paleoantropologie 32:29–38.

Álvarez-Laó D. 2003. Macromamíferos fósiles del Pleistoceno de Asturias. Revisión bibliográfica y datos actuales. Naturalia Cantabricae 2:11–23.

Álvarez-Laó D. 2014. The Jou Puerta cave (Asturias, NW Spain): a MIS 3 large mammal assemblage with mixture of cold and temperate elements. Palaeogeography, Palaeoclimatology, Palaeoecology 393:1–19.

Andrist D, Walter Flükiger Albert A. Stämpfli, 1964. Das Simmental zur Steinzeit. Acta Bernensia 3:1–211.

Anelli F. 1954. Contributo alla conoscenza della fauna diluviale della caverna Pocala di Aurisina (Carso Triestino). Memorie descrittive della Carta Geologica d’Italia 11:1–57.

Antunes MT, Cabral JMP, Cardoso JL, Pais J, Soares AM. 1989. Paleolítico médio e superior em Portugal: datas 14C, estado actual dos conhecimentos, síntese e discussão. Ciências da Terra 10:127–138.

Aouraghe H. 1999. Reconstitution de paléoenvironnement par les grand mammifères. Les faunes Pléistocène moyen d’Ornac 3 (Ardèche, France). L’Anthropologie 103(1):177–184.

Aparicio J, Pérez M, Vives E, Fumanal MP, Dupré M. 1982. La Cova de les Calaveres (Benidoleig, Alicante). Diputació de València, Servicio de Investigación Prehistórica, Serie de trabajos varios 75: 1–164.

Apellániz JM, Nolte E. 1967. Cuevas sepulcrales de Vizcaya. Excavación, estudio y datación por el C. 14. Munibe 19:159–226.

Arceredillo D. 2010. Los macromamíferos del yacimiento del Pleistoceno superior de Prado Vargas (Burgos, España). In: Meléndez G. (Ed.), III Congreso ibérico de Paleontología. 26. Jornadas de la Sociedad Española de Paleontología. Publicaciones del Seminario de Paleontología de Zaragoza 9:63–66.

Arceredillo D, Gómez-Olivencia A, San Pedro-Calleja Z. 2013. La fauna de micromamíferos de los niveles pleistocenos de la Cueva de Arlanpe (Lemoa, Bizkaia). In: Rios-Garaizar J, Garate D, Gómez-Olivencia A. (Eds), La Cueva de Arlanpe (Lemoa): ocupaciones humanas desde el Paleolítico medio antiguo hasta la prehistoria reciente. Kobie Bizkaiko Arkeologi Indusketak 3:123–160.

Argant A. 1991. Carnivores quaternaires de Bourgogne. Documents des Laboratoires de Géologie Lyon 115:1–301.

Arribas A. 1997. Un leopardo, *Panthera pardus* (Linnaeus, 1758), en el Pleistoceno de la Cueva de los Torrejones (Tamajón, Guadalajara, Espaᾖa). Geogaceta 22:19–22.

Arribas A, Solano JG, Garrido G, Carroza JA. 2008. El registro diferencial de carnívoros y homínidos en los karst del Pleistoceno del Sistema Central español: condicionantes geológicos y espaciales. Zooarqueología hoy. In: Díez JC. (ed..), Encuentros Hispano-Argentinos, Universidad de Burgos, Burgos, pp. 39–52.

Arsuaga JL, Baquedano E, Pérez-González A, Sala N, Quam RM, Rodríguez L, García R, García N, Álvarez-Lao DJ, Laplana C, Huguet R, Sevilla P, Maldonado E, Blain HA, Ruiz-Zapata MB, Sala P, Gil-García MJ, Uzquiano P, Pantoja A, Márquez B. 2012. Understanding the ancient habitats of the last-interglacial (late MIS 5) Neanderthals of central Iberia: paleoenvironmental and taphonomic evidence from the Cueva del Camino (Spain) site. Quaternary International 275:55–75.

Bächler E. 1907. Die prähistorische Kulturstätte in der Wildkirchli-Ebenalp-Höhle (Santisgebirge, 1477-1500 m ü.M.). Neues Jahrbuch für Mineralogie Abhandlungen 1(4):1–74.

Bächler E. 1912. Das Wildkirchli, die älteste prähistorische Kulturstation der Schweiz und ihre Beziehungen zu den altsteinzeitlichen Niederlassungen des Menschen in Europa. Schriften des Vereins für Geschichte des Bodensees und seiner Umgebung 41:14–38.

Bächler E. 1936. Das Wildkirchli. Eine Monographie. Buchdruckerei H. Tschudy, Basel, pp. 254.

Bächler E. 1940. Das alpine Paläolithikum in der Schweiz im Wildkirchli, Drachenloch und Wildenmannisloch. Die ältesten menschlichen Niederlassungen aus der Altsteinzeit des Schweizerlandes. Verlag Birkhäuser, Basel.

Bailey TN. 1993. The African leopard: ecology and behavior of a solitary felid. Columbia University Press, New York, pp. 429.

Balme F. 1984. Les Carnivores du Gisement Pléistocène supérieur de l’Abri des Pêcheurs (Ardèche). Université Claude Bernard, Lyon, 1:1–29.

Barandiarán I. 1967. El Paleomesolítico del Pirineo Occidental. Bases para una sistematización tipológica del instrumental óseo paleolítico. Zaragoza.

Barroso C, Riquelme J, Moigne AM, Banes L. 2003. Las faunas de grandes mamíferos del Pleistoceno Superior de la cueva del Boquete de Zafarraya. Estudio paleontológico y paleoecológico. El Pleistoceno Superior de la cueva del Boquete de Zafarraya. Arqueología Monografías 15:169–222.

Barroso C, Riquelme JA, Moigne AM, Banes L. 2006. Les faunes de grands mammifères du Pléistocène supérieur de la Grotte du Boquete de Zafarraya. Étude paléontologique, paléoécologique et archéozoologique. In: Barroso C, de Lumley H. (Eds.), La Grotte du Boquete de Zafarraya, Málaga, pp. 675–891.

Barry JC. 1987. Large carnivores (Canidae, Hyaenidae, Felidae) from Laetoli. In: Leakey MD, Harris JM. (Eds.), Laetoli - a Pliocene site in Tanzania. Clarendon Press, Oxford, pp. 235–258.

Bartosiewicz L. 2001. A leopard (*Panthera pardus* L. 1758) find from the late Middle Ages in Hungary. In: Buitenhuis H, Prummel W. (Eds.), Animals and man in the past. Groningen Archeological Research and Consultancy 41:151–160

Bartosiewicz L. 2015. “Every skin teeth aint a laugh”: Medieval leopard find from Hungary. Hungarian Archaeology 1:1–8.

Baryshnikov GF. 2011. Pleistocene Felidae (Mammalia, Carnivora) from the Kudaro Paleolithic Cave sites in the Caucasus. Proceedings of the Zoological Institute Russian Academy of Science 315(3):197–226.

Baryshnikov GF, Tsoukala E. 2010. New analysis of the Pleistocene carnivores from Petralona Cave (Macedonia, Greece) based on the collection of the Thessaloniki Aristotle University. Geobios 43:389–402.

Basler VD, Malez M, Brunnacker K. 1966. Die Rote Höhle (Crvena Stijena) bei Bileea/Jugoslawien – Vorbericht. Eiszeitalter und Gegenwart 17:61–68.

Bassiakos JE. 1993. Dating of fossils from caves and speleothems: evidence from electron spin resonance (E.S.R.) technique, the study of underground karst morphology and the relevant radiometric and geological conditions in speleoevironments of Dyros, Mani. PhD Thesis, Athens University, Athens, 380 pp.

Bataglia R. 1918. Le industrie e le faune pleistoceniche d’Italia. Rivista di Antropoligia 23:1–102.

Bataglia R. 1921. La caverna Pocala. Atti dell’Accademia Nazionale dei Lincei 5(13):622–686.

Bate DMA. 1928. Vid. Garrod, D., Buxton, L.. Elliot Smith. G. & Bate, D. M. A.

Bégouen H, Comte d, Astre G. 1927. A propos du crâne de panthère, dit de Malarnaud, et sa non–fossilisation. Bulletin de la Société d’histoire naturelle de Toulouse 1:469–476.

Quirós BdF, Maíllo-Fernández JM, Castaños P, Neira A. 2014. The Gravettian of El Castillo revisited (Cantabria, Spain). Quaternary International 359–360:462–478.

Berto C, Bertè D, Luzi E, López-García JM, Pereswiet–Soltan A, Arzarello M. 2016. Small and large mammals from the Ciota Ciara cave (Borgosesia, Vercelli, Italy): an Isotope Stage 5 assemblage. Comptes Rendus Palevol 15:669–680.

Berto C, Rubinato G. 2013. The upper Pleistocene mammal record from Caverna degli Orsi (San Dorligo della Valle e Dolina, Trieste, Italy): A faunal complex between eastern and western Europe. Quaternary International 284:7–14.

Bibikova, V.I., 1958. Fauna Olvii na ii peryferïï za materialamy rozkopok 1935-1948. Arkheolohichni Pamyatky Ukrayinska Radyanska Sotsialistychna Respublika 7:143–155.

Blasco Sancho MF. 1995. Hombres, Fieras y Presas. Estudio arqueozoológico y tafonómico del yacimiento del Paleolítico medio de la Cueva de Gabasa 1 (Huesca). Dpto. Ciencias de la Antigüedad (Área de Prehistoria), Universidad de Zaragoza, Zaragoza.

Blasco Sancho MF, Montes Ramirez L. 1997. Los Hiénidos del yacimiento musteriense de Gabasa I (Huesca, España). Bolskan 14:9–27.

Blasius W. 1894. Feuersteingerathe aus dem neuen Theile der Baumannshohle. Jahresbericht des Verein für Naturwissenschaft zu Braunschweig 9:13–14.

Blasius W. 1898a. Spuren palaolithisdier Mensdien in den Diluvial-Ablagerungen der Rübeländer Höhlen. Beiträge zu der Anthropologie des Herzogthums Braunschweig 29:1–37.

Blasius W. 1898b. Die anthropologisch wichtigen Funde in den Höhlen bei Rübeland. Correspondenz-Blatt der Deutschen Gesellschaft für Anthropologie, Ethnologie und Urgeschichte 10:109–113.

Blasius W. 1900. Bericht über die fortgesetzten Ausgrabungen in den neuen Theilen der Baumannshöhle bei Rübeland am Harz während der Jahre 1898 und 1899. Jahresbericht des Verein für Naturwissenschaft zu Braunschweig 12:83–86.

Blasius W. 1902. Fortsetzung der Ausgrabungen in den neuen Theilen der Baumannshöhle bei Rübeland am Harze im Jahre 1901. Jahresbericht des Verein für Naturwissenschaft zu Braunschweig 13:72–74.

Bohigas R, Muñoz E. 2002. Excavaciones arqueológicas de urgencia en el Covacho de Arenillas (Islares, Castro Urdiales). 1992. In: Actuaciones arqueológicas en Cantabria. Arqueología de gestión. Consejería de cultura, turismo y deporte. Gobierno de Cantabria, Santander, pp. 45–47.

Bon M, Piccoli G, Sala B. 1991. I giacimenti quaternari di vertebrati fossili nell’Italia Nord-Orientale. Memorie di Scienze Geologiche 43:185–231.

Bona F. 2006. Systematic position of a complete lion-like cat skull from the Eemian ossiferous rubble near Zandobbio (Bergamo, North Italy). Rivista italiana di paleontologia e stratigrafia 112(1):157–166.

Bona F, Sardella R. 2012. The Middle Pleistocene large felids (Mammalia) from breccia di Soave (Verona, N-E Italy). Rivista Italiana di Paleontologia e Stratigrafia 118(1):193–199.

Bonifay M-F. 1971. Carnivores quaternaries du Sud-Est de la France. Mémoires du Muséum National d’Histoire Naturelle Paris C 11:1–377.

Bosscha Erdbrink DP. 1986. Lions, leopards and a hyena from deposits along the Meuse and the Waal Netherlands. Proceedings of the Koninklijke Nederlandse Akademie van Wetenschappen Serie B Palaeontology, Geology, Physics, Chemistry, Anthropology 89(1):1–14.

Bosscha Erdbrink DP 1988. Contribution to the record of fossil mammals from the Meuse levels. Proceedings of the Royal Society B 91(4):321–338.

Bouchud J. 1951. Etude paléontologique de la faune d’Isturitz. Mammalia 15:184–203.

Bouchud J. 1952. Les Oiseaux d’lsturitz. Bulletin de la Société préhistorique Ariège-Pyrénées 49:450–459.

Bouchud J. 1969. La faune moustérienne de Carigüela (Pinar, Grenade). L’Anthropologie 73(3–4):361–364.

Boule M. 1906. Les grands Chats des cavernes. Annales de Paléontologie 1, 69–95.

Boule M. 1910. Les Grottes du Grimaldi. Géologie et Paléontologie 1(4):157–362.

Boule M. 1919. Géologie et Paléontologie. Les Grottes de Grimaldi 1(4):237–362.

Boule M, Vileneuve Ld. 1927. La grotte de l’Observatoire à Monaco. Archives de l’Institut de Paléontologie Humaine 1:1–113.

Bourguinat JR. 1879. Histoire des Felidae fossiles constatés en France dans les dépôts de la période Quaternaire. Paris.

Boursiac LG. 1939. Le crâne de *Felis pardus begoueni* (Fraipont) de la caverne de Trois Frères (Ariège). Mélanges Bégouen 4:69–75.

Brain CK. 1981. The Hunters or the hunted? An introduction to African cave taphonomy. The University of Chicago Press, Chicago, pp. 365.

Brandt JF. 1877 Versuch einer Monographie der Tichorhinen Nashorner nebst Bemerkungen uber *Rhinoceros leptorhinus* Cuvier . Memoires de l’Academie Imperiale des Sciences de St. Petersbourg Serie 7(24):1–135.

Brandt F. 1870. Neue Untersuchungen der in den Altaischen Höhlen aufgefundenen Säugethierreste, ein Beitrag zur quaternären Fauna des Russischen Reiches. Bulletin de l’ Academie Imperial de Science St. Pétersburg 7:359–438.

Breuer R. 1931. Pathologisch-anatomische Befunde am Skelette des Höhlenbären. In Kyrle A. (ed.), Die Drachenhöhle bei Mixnitz. Speläologische Monographien 7–8:1-611.

Brugal J-P. 2010. Carnivores pléistocènes (Hyénidés, Canidés, Félidés) dans les grottes du Portugal. Zona arqueológica. Actas della Reunión de cientificos sobre cubiles de hiena (y otros grandes carnivoros) en los yacimientos arqueológicos de la Peninsula Ibérica 13:92–106.

Brugal JP, Argant J, Crispim JA, Figueiredo S, Martín A. Palmqvist P. 2012. The complex carnivore-rich assemblages from Furninha (Peniche, Portugal): a multidisciplinary approach. Journal of Taphonomy 10(3–4):417–438.

Bruijn Pd, Bruijn Id. 2017. De eerste vondst in Nederland van een premolaar (p4) van het luipaard, *Panthera pardus* (linnaeus, 1758) gevonden op het strand van Maasvlakte 2. Cranium 34(1):13–18.

Bulgarelli GM. 1974. Industrie musteriane della Barma Grande ai Balzi Rossi di Grimaldi (Liguria). Studi di Paleoathropolgica Paleontologica e Geologia del Quaternario 2:91–129.

Busk G. 1877. On the ancient or quaternary fauna of Gibraltar, as exemplified in the mammalian remains of the ossiferous breccia. The Transactions of the Zoological Society of London 10(2):53–137.

Cabrera V. 1984. El yacimiento de la Cueva de “El Castillo”. Biblioteca Praehistorica Hispana 22:1–484.

Cáceres I, Canyelles J, Esteban M, Giralt S, González F, Huguet R, Ibáñez N, Lorenzo C, Mata M, Pinto A, Revilla A, Rosell J, Santiago A, Segura E, Vallverdú J, Zaragoza J. 1993. Estudi d’un exemplar de *Panthera pardus* i un de *Panthera leo spelaea* localitzats a l’Abric Romaní (Capellades, Anoia) i anàlisi de la problemática dels carnívors en aquest jaciment. Estrat 6:31–41.

Caceres I, Rosell J, Huguet R. 1998. Séquence d’utilisation de la biomasse animale dans le gisement de l’Abric Romani (Barcelone, Espagne). Quaternaire 9(4):379–383.

Caloi L, Palombo MR. 1994. Le faune a grandi mammiferi del Pleistocene superior dell’Italia centrale: biostratigrafia e paleoambiente. Bollettino del Servizio Geologico d’Italia 111:77–104.

Capasso Barbato L, Gliozzi E. 1995. Biochronological and palaeogeographical implications of a well-balanced late Middle Pleistocene fauna from Quisisana-Certosa (Capri, Southern taly). Bollettino Società Paleontologica Italiana 34:235–261.

Carballo J. 1923. Excavaciones en la cueva del Rey, en Villanueva (Santander). Memoria Junta Superior de Excavaciones y Antigüedades 53(9):1–40.

Carbonell E, Estévez J, Gusi F. 1979. Resultados preliminares de los trabajos efectuados en el yacimiento del Pleistoceno medio de Cau d’En Borràs (Oropesa, Castellón). Quaderns de prehistòria i arqueologia de Castelló 6:7–18.

Cardoso JL. 1993. Contribuição para o conhecimento dos grandes mamíferos do Plistocénico superior de Portugal. Dissertação de doutoramento apresentado à Universidade Nova de Lisboa. Câmara Municipal de Oeiras, Oeiras, 557 pp.

Cardoso JL. 1995. Grutas do Maciço Hespérico de Portugal com faunas de grandes mamíferos plistocénicos. Caderno Labolatorio Xeolóxico de Laxe Coruña 20:213–229.

Cardoso JL. 1996. Les grands marnmiferes du Pléistocene supérieur du Portugal. Essai de synthêse. Geobios 29(2):235–250.

Cardoso JL, Regala FT. 2006. O Leopardo, *Panthera pardus* (L., 1758), do Algar da Manga Larga (Planalto de Santo António, Porto de Mós). Comunicações Geológicas 2006:119–144.

Carrión JS, Finlayson C, Fernández S, Finlayson G, Allué E, López-Sanchez JA, López-García P, Gil-Romera G, Bailey G, González-Sampériz P. 2008. A coastal reservoir of biodiversity for Upper Pleistocene human populations: palaeoecological investigations in Gorham’s Cave (Gibraltar) in the context of the Iberian Peninsula. Quaternary Science Reviews 27(23–24):2118–2135.

Cassoli PF, Tagliacozzo A. 1991. Considerazioni paleontologiche, paleoecologiche e archeozoologiche sui macromammiferi e gli uccelli dei livelli del Pleistocene Superiore del Riparo di Fumane (VR) (Scavi 1988-1991). Bollettino del Museo Civico di Storia Naturale di Verona 18:349–446.

Castaños P. 1983. Estudio de los Macromamı´feros del yacimiento prehisto´rico de Bolinkoba (Abadiano, Vizcaya). Kobie Paleontropología 13:261–298.

Castaños P. 1987. Los carnívoros prehistoricos de Vízcaya. Kobie 16:7–76.

Castaños P. 2010. Nuevas cavidades con carnivoros y humanos en el Cantabrico Oriental. Zona Arqueológica 13:262–268.

Castaños PM. 1983. Estudio de los macromamíferos del yacimiento prehistórico de Bolinkoba (Abadiano-Vizcaya). Kobie Serie Paleoantropologie 13:261–298.

Castaños PM. 1987. Los carnívoros prehistóricos de Vizcaya. Kobie Serie Paleoantropologie 16:7–76.

Castaños PM. 2005. Revisión actualizada de las faunas de macromamíferos del Würm antiguo en la Región Cantábrica. Museo de Altamira. Monografías 20:201–207.

Castaños PM. 2010. Nuevas cavidades con carnívoros y humanos en el Cantábrico oriental. Zona Arqueológica de Cobá 13:263–268.

Castaños PM. 2017b. Los carnívoros de la excavación histórica de El Castillo. In: Castaños P. (Ed.), El Castillo: historia de una fauna olvidada. Monografías del Mupac, Cantabria, pp. 224–247.

Castaños PM, Castaños J. 2007. Estudio de la fauna del Abrigo del Cuco. In: Muñoz E, Montes R. (Eds.), Intervenciones arqueológicas en Castro Urdiales 3:161–170.

Castaños P, Castaños J. 2017. Estudio de la fauna de macromamíferos del yacimiento de Praileaitz I (Deba, Gipuzkoa). In: Peñalver X, San Jose S, Mujika-Alustiza JA (eds.), La Cueva de Praileaitz I (Deba, Gipuzkoa, Euskal Herria) Intervención Arqueológica 2000-2009. Munibe Monographs, Anthropology and Archaeology series 1:221–265.

Castaños J, Castaños P, Murelaga X. 2016. Imanolen Arrobia. A new upper Pleistocene carnivore den in the north of the Iberian Peninsula (Deba, Spain). Ameghiniana 54:370–389.

Castaños J, Castaños P, Suárez-Bilbao A, Iriarte-Chiapusso M-J, Arrizabalaga A, Murelaga X. 2019. A large mammal assemblage during MIS 5c: Artazu VII (Arrasate, northern Iberian Peninsula). Historical Biology 31(6):731–747.

Chantre E. 1901. Paléontologie Humaine: L’homme Quaternaire dans: L’Homme Quaternaire dans le Bassin du Rhône: Étude Géologique et Anthropologique: propositions données par La Faculté. A. Rey, Harvard University.

Christiansen P. 2008. Phylogeny of the great cats (Felidae: Pantherinae), and the influence of fossil taxa and missing characters. Cladistics 24:977–992.

Christiansen P, Mazák H. 2009. A primitive Late Pliocene cheetah, and evolution of the cheetah lineage. Proceedings of the National Academy of Sciences of the United States of America 106(2):512–551.

Clottes J. 2003. Chauvet Cave. The art of earliest times. University of Utah Press, Salt Lake City, 232 pp.

Clutton-Brock J. 1979. The mammalian remains from the Jericho Tell. Proccedings of the Prehistoric Society 45:135–157.

Cohen KM, Gibbard P. 2011. Global chronostratigraphical correlation table for the last 2.7 million years. Subcommission on Quaternary stratigraphy (International Commission on Stratigraphy), Cambridge, England.

Corchón S. 2014. La Cueva de las Caldas (Priorio, Norte de España). In: Sala R, Carbonell E, Bermúdez de Castro JM, Arsuaga JL. (Eds.), Los cazadores recolectores del Pleistoceno y del Holoceno en Iberia y el Estrecho de Gibraltar. Estado actual del conocimiento del registro arqueológico. Universidad de Burgos y Fundación Atapuerca, pp. 64–75.

Corral JC. 2012. Técnicas aplicadas en la preparación de un cráneo cuaternario de *Panthera pardus* (Linneo, 1758) de Ataun (cueva Allekoaitze, Guipúzcoa, España). Boletín Geológico y Minero 123(2):127–138.

Costa OG. 1886. Descrizione degli avanzi scheletrici renvenuti nella grotta ossifera di Campagna. Atti dell’Accademia delle scienze fisiche e matematiche Napoli 8(3):1–16.

Crégut-Bonnoure E, Boulbes N, Guérin C, Pernaud J, Tavoso A, Cammas R. 2010. Le contexte géomorphologique et faunique de l’homme de Montmaurin (Haute. Garonne). The geomorphological and fauna context of the Montmaurin’s man (Haute-Garonne). Préhistoire meditérranéennes 2010(1):35–85.

Crégut-Bonnoure E., Slimak L., Lewis JE, Brochier JE. 2011. Novelles données sudr les sites pléistocène et holocènes à *Ursus arctos* du Vaucluse (sud-est de la France). Quaternaire, Hors-érie 4:147–183.

Currant A. 1984. The mammalian remains. In Pontnewydd Cave, Green HS (ed.). National Museum of Wales, Cardiff, pp. 171–180.

Currant A. 2004. The Quaternary mammal collections at the Sommerset Country Museum Taunton. In: Schreve DC. (Ed.), The Quaternary mammals of southern and eastern England. Field Guide, pp. 101–109.

Currant A, Jacobi R. 1997. Vertebrate faunas of the British Late Pleistocene and the chronology of human settlement. Quaternary Newsletter 82:1–8.

Currant A, Jacobi R. 2001. A formal mammalian biostratigraphy for the Late Pleistocene of Britain. Quaternary Science Reviews 20:1707–1716.

Cuvier G. 1825. Recherches sur les ossemens fossiles ou l’on rétablit les caractères de plusieurs animaux dont les révolutions du globe ont détruit les espèces. G. Dufour et E. d’Ocagne, Paris, 487 pp.

Dari A. 1999. Les grands mammifères du site pleistocene supérieur de la grotte du Castillo. Étude archéozoologique: Donnes paleontologiques, taphonomiques et palethnographiques. Espacio, Tiempo y Forma, Série I, Prehistoria y Arqueologfa 12:103–127.

Darlas A. 2007. Le Moustérien de Grèce à la lumière des récentes recherches. L’Anthropologie 111:346–366.

Daura J, Sanz M, Subira ME, Quam R, Fullola JM, Arsuaga JL. 2005. A neanderthal mandible from the Cova del Gegant (Sitges, Barcelona, Spain). Journal of Human Evolution 49(1):56–70.

Daura J, Sanz M, García N, Allué E, Vaquero M, Fierro E, Carrión JS, López-García JM, Blain HA, Sánchez-Marco A, Valls C, Albert RM, Fornós JJ, Julià R, Fullola JM, Zilhão J. 2013. Terrasses de la Riera dels Canyars (Gava, Barcelona): the landscape of Heinrich Stadial 4 north of the “Ebro frontier” and implications for modern human dispersal into Iberia. Quaternary Science Reviews 60:26–48.

Daura MSJ, Subirà E. 2008. La mandíbula de neandertal de la cova del Gegant (Sitges, el Garraf). Trobada d’Estudiosos del Garraf 5:131–136.

Davis SJM. 2002. The mammals and birds from the Gruta do Caldeirão, Portugal. Revista Portuguesa de Arqueologia 5(2):29–98.

Dawkins WB, Sanford WA. 1866-1872. The British Pleistocene Mammalia: British Pleistocene Felidae. Paleontographical Society, London, 628 pp.

Deaujard C. 2008. Exploitation du milieu animal par les Néanderthaliens dans le Sud-Est de la France. Archéorient Environnements et Sociétés de l’Orient ancien. Université Lumière, Lyon, 935 pp.

De la Rasilla M, Santamaría D. 2011-2012. El Paleolítico medio en Asturias. Mainake 33:31–62.

Delibes M. 1972. Informe paleontológico de la fauna de la Cueva de la Ermita. In: Moure JA, Delibes GA. (Eds.), El yacimiento musteriense de la Cueva de la Ermita. Noticiario Arqueológico Hispánico. Prehistoria 1:41–44.

De Lombera-Hermida A, Rodríguez XP, Fábregas-Valcarce R. 2014. El yacimiento arqueo-paleontológico de Cova Eirós (Triacastela, Lugo). In: Sala R. (Ed.), Los cazadores recolectores del Pleistoceno y Holoceno en Iberia y el Estrecho de Gibraltar: Estado actual del conocimiento del registro arqueológico. Universidad de Burgos y Fundación Atapuerca, pp. 18–25.

Depéret C. 1928. Etude géologique et paléontologique du gisement de Glozel. Cahier de Glozel 7:49-64.

Del Campana D. 1914. Sopra alcuni resti di mammiferi quaternary della Grotta del Pastore (Grotta della Livrea) in provincial di Genova. Achaeologica Anthropologica Etnologica 44(1):1–6.

Del Campana D. 1914. Mammiferi nuovi o poco noti della Grotta di Cucigliana (Monti Pisani). Bolletino Società Geologica Italiana 31:412–418.

De Stefani C. 1917. La Grotta preistorica di Equi nelle Alpi Apuane. Estratto dall’archivio per l’Antropologia e la Etnologia 46(1–2):41–82.

Diedrich C. 2009. Steppe lion remains imported by Ice Age spotted hyenas into the Late Pleistocene Perick Caves hyena den in Northern Germany. Quaternary Research 71(3):361–374.

Diedrich C. 2010. Disappearance of the last hyenas and lions of Europe in the Late Quaternaryea chain reaction of large mammal mammoth and woolly rhino prey extinction. In: Borcherens H, Pacher M. (Eds.), SSP.4 - Late Quaternary mammal ecology: insight from new approaches (direct dating, stable isotopes, DNA). Lecture, Abstract, Geophysical Research Abstracts 12:2010–2124.

Diedrich C. 2011a. Late Pleistocene steppe lion *Panthera leo spelaea* (Goldfuss, 1810) footprints and bone remains from open air sites in northern Germany - evidence of hyena-lion antagonism in Europe. Quaternary Science Reviews 30:1883–1906.

Diedrich C. 2011b. The largest European lion *Panthera leo spelaea* (Goldfuss) population from the Zoolithen Cave, Germany e specialized cave bear predators of Europe. Historical Biology 23(2–3):271–311.

Diedrich C. 2011c. The Late Pleistocene spotted hyena *Crocuta crocuta spelaea* (Goldfuss, 1823) population from the Zoolithen Cave at Gailenreuth (Bavaria, South Germany) - a hyena cub raising den of specialized cave bear scavengers in boreal forest environments of Central Europe. Historical Biology 23(4):335–367.

Diedrich C. 2011d. Ichnological and ethological studies in one of Europe’s famous bear den in the Ursilor Cave (Carpathians, Romania). Ichnos 18(1):9–26.

Diedrich C. 2012. Cave bear killers and scavengers in the Final Ice Age of Europe e feeding specialization as reaction on the mammoth steppe fauna absence in mountainous regions. Quaternary International 255:59–78.

Diedrich C. 2013a. Late Ice Age wolves as cave bear scavengers in the Sophie’s Cave of Germany e extinctions of cave bears as result of climate/habitat change and large carnivore predation stress in Europe. International Scholarly Research Notices Zoology 2013:1–25.

Diedrich C. 2013b. Evolution, Horse, Taphonomie und Prädatoren der Rübeländer Höhlenbären, Harz (Sachsen–Anhalt). Mitteilungen des Verbandes der deutschen Höhlen- und Karstforscher 59(1):4–29.

Diedrich C. 2013c. Impact of the German Harz Mountain Weichselian ice-shield and valley glacier development onto Palaeolithic and megafauna disappearance. Quaternary Science Reviews 82:167-198

Diedrich C. 2014. Holotype skulls, stratigraphy, bone taphonomy and excavation history in the Zoolithen Cave and new theory about Esper’s “great deluge”. E&G Quaternary Science Journal 63(1):78–98.

Diedrich C, Rathgeber T. 2012. Late Pleistocene steppe lion *Panthera leo spelaea* (Goldfuss, 1810) skeleton remains of the Upper Rhine valley (SW Germany) and contribution to their sexual dimorphism, taphonomy and habitus. Historical Biology 24 (1):1–28.

Dimitrijević VM. 1991. Quaternary mammals of the Smolućka Cave in southwest Serbia. Paleontologia Jugoslavica 41:1–88.

Díez JC, García MA, Gil E, Jordá JF, Ortega AI, Sánchez A, Sánchez B. 1988-89. La cueva de Valdegoba (Burgos). Primera campaña de excavaciones. Zephyrus 41–42:55–74.

Diez F-LJC, Pérez Lopez S, Martinez Moreno J. 2010. Restos de Neandertales y hiénidos en la Peninsula Ibérica. Zona Arqueológica 13:230–244.

Echassoux A. 2004. Étude taphonomique, paléoécologique et archéozoologique des faunes de grands mammifères de la second moitié du Pléistocène inférieur de la grotte du Vallonnet (Roquebrune-Cap-Martin, Alpes-Maritimes, France). L’Anthropologie 108:11–53.

Edgaonkar A, Chellam R. 2009. Food habit of the leopard, *Panthera pardus*, in the Sanjay Gandhi National Park, Maharashtra, India. Mammalia 66(3):353–360.

Estévez J. 1975-76. Hallazgo de una pantera en el Pleistoceno catalán. Speleon 22:171–178.

Estévez J. 1979. La fauna del Pleistoceno catalán, vol. 2. PhD Thesis, Universitat de Barcelona, Barcelona, 345 pp.

Estévez J. 1987. La fauna de L’Arbreda (s. alfa) en el conjunt de faunes del Pleistocè superior. Cypsela 6:73–87.

Fabiani R. 1923. La fauna mammalogica quaternaria della Bucca del Tasso. Archaeologica Anthropologica Etnologica 52:10–20.

Falguères C, Yokohama Y, Arrizabalaga A. 2005-2006. La geocronología del yacimiento pleistocénico de Lezetxiki (Arrasate, País Vasco). Crítica de las dataciones existentes y algunas nuevas aportaciones. Munibe 57(2):93–106.

Farhadinia MS, Nezami B, Hosseini-Zavarei F, Valizadeh M. 2009. Persistence of Persian leopard in a buffer habitat in northeastern Iran. Cat News 51:34–36.

Farina S. 2010. I mammiferi del tardo Pleistocene-Olocene antico delle grotte carsiche del versante Sud-Occidentale del Monte Pisano (Pisa, Toscana): revisione sistematica, considerazioni biocronologiche e climatico-ambientali. Unpublished PhD Thesis, University of Pisa, Pisa, 229 pp.

Farina S. 2011. Late Pleistocene mammals from Grotta Cucigliana (Monte Pisano, Italy). Atti della Società toscana di scienze naturali. Memorie, Serie B 118:67–74.

Farina S. 2013. Catalogue of the Late Pleistocene fossil mammalian collection from “Grotta Cucigliana” (Natural History Museum, University of Pisa). Atti della Società toscana di scienze naturali. Memorie, Serie A 120:55–62.

Fejfar O. 1961. Review of Quaternary vertebrata in Czechoslovakia. Prace Instytutu Geologicznego 34:109–118.

Fernández J. 2004. Datos sobre la incidencia de carnívoros en la Cova del Bolomor (Tavernes de la Valldigna, Valencia). Miscelánea en homenaje a Emiliano Aguirre. Museo Arqueológico Regional 4:141–157.

Ficcarelli G, Torre D. 1968. Upper Villafranchian panthers of Tuscany. Palaeontographica Italiana 64:169–184.

Fischer K. 2000. Ein Leoparden-Fund, *Panthera pardus* (L., 1758), aus dem jungpleistozänen Rixdorfer Horizont von Berlin und die Verbreitung des Leoparden im Pleistozän Europas. Mitteilungen des Museums für Naturkunde Berlin. Geowissenschaftliche Reihe 3, 221–227.

Fladerer F. 1997a. Große Peggauerwandhöhle. In: Döppes D, Rabeder G. (Eds.), Pliozäne und pleistozäne Faunen Österreichs. Mitteillungen der Kommission für Quartärforschung der Österreichischen Akademie der Wissenschaften 10:320–325.

Fladerer F. 1997b. Holzingerhöhle. In: Döppes D, Rabeder G. (Eds.), Pliozäne und pleistozäne Faunen Österreichs. Mitteillungen der Kommission für Quartärforschung der Österreichischen Akademie der Wissenschaften 10:311–312.

Fladerer F. 1997c. Fünffenstergrotte. In: Döppes D, Rabeder G. (Eds.), Pliozäne und pleistozäne Faunen Österreichs. Mitteillungen der Kommission für Quartärforschung der Österreichischen Akademie der Wissenschaften 10:308–310.

Fladerer F. 1997d. Luegloch bei Köflach. In: Döppes D, Rabeder G. (Eds.), Pliozäne und pleistozäne Faunen Österreichs. Mitteillungen der Kommission für Quartärforschung der Österreichischen Akademie der Wissenschaften 10:312–316.

Fladerer F, Frank C. 1997a. Tropfsteinhöhle am Kugelstein. In: Döppes D, Rabeder G. (Eds.), Pliozäne und pleistozäne Faunen Österreichs. Mitteillungen der Kommission für Quartärforschung der Österreichischen Akademie der Wissenschaften 10:342–348.

Fladerer F, Frank C. 1997b. Tropfsteinhöhle am Kugelstein. In: Döppes D, Rabeder G. (Eds.), Pliozäne und pleistozäne Faunen Österreichs. Mitteillungen der Kommission für Quartärforschung der Österreichischen Akademie der Wissenschaften 10:342–348.

Fortea J, De la Rasilla M, Rodríguez V. 1992. La cueva de Llonín (Llonín, Peñamera Alta). Campañas de 1987 a 1990. Excavaciones arqueológicas en Asturias 1987-1990 2:9–18.

Fortea J, De la Rasilla M, Rodríguez V. 1995. La cueva de Llonín (Llonín, Peñamera Alta). Campañas de 1991 a 1994. Excavaciones arqueológicas en Asturias 1991-1994 3:33–43.

Fortea J, De la Rasilla M, Rodríguez V. 1999. La cueva de Llonín (Llonín, Peñamera Alta). Campañas de 1995 a 1998. Excavaciones arqueológicas en Asturias 1995-1998 4:59–73.

Fourvel J-B, Fosse P, Brugal J-P, Crégut-Bonnoure E, Slimak L, Tournepiche J-F. 2014. Characterization of bear remains consumption by Pleistocene large carnivores (Felidae, Hyaenidae, Canidae). Quaternary International 339–340:232–244.

Fraga E. 1958. Catálogo bibliográfico de la fauna cuaternaria asturiana. Monografías Geológicas VIII. Instituto de Geología Aplicada, Oviedo.

Fraipont C. 1923. Crane de Panthère ou de Lynx géant provenent de la caverne de Trois-Frères (Ariège). Revue Anthropologique 33:42.

Freudenberg W. 1909. Die Fauna von Hundsheim in Niederösterreich. Jahrbuch der Kaiserlich-Königlichen Geologischen Reichsanstalt 58(2):197–222

Freudenberg W. 1914. Die Säugetiere des älteren Quartärs von Mitteleuropa, mit besonderer Berücksichtigung der Fauna von Hundsheim und Deutsch-Altenburg in Niederösterreich nebst Bemerkungen über verwandte Formen anderer Fundorte. Geologisch Paläontologische Abhandlungen Neue Funde 12(4–5):375–391

Galik A, Horejs B, Nessel B. 2012. Der nächtliche Jäger als Beute. Studien zur prähistorischen Leopardenjagd. Prähistorische Zeitschrift 87(2):261–307.

García N, Arsuaga JL, Torres T. 1997. The carnivore remains from the Sima de los Huesos Middle Pleistocene site (Sierra de Atapuerca, Spain). Journal of Human Evolution 33:109–127.

Gardeisen A. 1997. La grotte Ouest du Portel, Ariège, France: Restes fauniques et stratégies de chasse dans le Pléistocéne pyrénéen. British Archaeological Report International Series 673:1–378.

Gardeisen A. 1999. Middle Palaeolithic Subsistence in the West Cave of ‘‘Le Portel’’ (Pyrénées, France). Journal of Archaeological Science 26:1145–1158.

Georgiadou-Dikaioulia E, Symeonidis NK, Theodorou GE. 2002. Palaiontologia, Spondylota. Part C. University of Athens.

Geraads D. 1995. Carnivoros Musterienses de la Cueva de Zafarraya (Malaga). Cuaternario y Geomorfológia, 9(3–4):51–57.

Gervais P. 1867. Zoologie et Paléontologie générales: nouvelles recherches sur les animaux vertébrés vivants et fossils. Arthus Bertrand, Sapienza, 335 pp.

Geyer E. 2007. 10 Jahre Forschungen im Weißenbach-Höhlen - projekt. Die Höhle 59(1–4):69–73.

Ghezzo E. 2014. The Late Pleistocene site of Equi (Massa, Apuane Alps): revaluation of historical data and new discoveries. PhD Thesis. Universite Firenza, Firenza.

Ghezzo E, Berté DF, Sala B. 2014. The revaluation of Galerian Canidae, Felidae and mustelidae of the Ceré cave (verona, Northeastern Italy). Quaternary International 339–340:76–89.

Ghezzo E, Palchetti A, Rook L. 2014. Recovering data from historical collections: stratigraphic and spatial reconstruction of the outstanding carnivoran record from the Late Pleistocene Equi cave (Apuane Alps, Italy). Quaternary Science Reviews 96:168–179.

Ghezzo E, Rook L. 2015. The remarkable *Panthera pardus* (Felidae, Mammalia) record from Equi (Massa, Italy): taphonomy, morphology, and paleoecology. Quaternary Science Reviews 110:131–151.

González Echegaray GJ, Freeman LG. 1971. Cueva Morín. Excavaciones 1966-1968. Patronato de las Cuevas Prehistóricas de la Provincia 6:1–112.

Groiss JT. 1979. Paläontologische Untersuchungen in der Zoolithenhöhle bei Burggeilenreuth. Ein vorläufiger Bericht. Erlanger Forschungen B Naturwissenschaften 5:79–93.

Groiss JT. 2002. Großkatzen-Reste aus der Zoolithenhöhle. Geologische Blätter für Nordost-Bayern und angrenzende Gebiete Gesamtinhaltsverzeichnis 52:85–108.

Guadelli J.L. 1990. Quelques données sur la faune de Coupe-Gorge, Montmaurin (Haute-Garonne, France). 2:107–126.

Harlé E. 1908. Faune quaternaire de la province de Santander (Espagne). Boletin de la Société Géologique de la France 4(8):1–300.

Harlé E. 1909. Faune de la grotte à Hyènes rayées de Furninha et d’autres grottes de Portugal. Bulletin de la Société Géologique de France 9(4):85–99.

Harlé E. 1910a. La *Hyaena intermedia* et les ossemens humatiles des cavernes de Lunel-Viel. Bulletin de la Société Géologique de France 4(10):34–50.

Harlé E. 1910b. Les Mammifères et Oisseaux quaternaires connus jusqu’ici en Portugal. Mémoire suivi d’une liste générale de ceux de la Péninsule Ibérique. Comunicações Da Commissão Do Serviço Geologico de Portugal 8:22–86.

Harlé E. 1911. Ensayo de una lista de mamíferos y aves conocidas hasta ahora en la Península Ibérica. Boletín del Instituto Geológico y Minero de España 32:135–163.

Harlé E. 1912. Les Mammifères et oiseaux quaternaires connus jusqu'ici en Portugal: Mémoire suivi d’une liste générale de ceux de la péninsule ibérique. Comunicações Da Commissão Do Serviço Geologico de Portugal 8:1–85.

Hayward MW, Henschel O, O’Brian J, Hofmeyr M, Balme G, Kerley GHI. 2006. Prey preferences of the leopard (*Panthera pardus*). Journal of Zoology 270:298–313.

Hemmer H. 1971. Zur Kenntnis pleistozäner mitteleuropäischer Leoparden (*Panthera pardus*). Neues Jahrbuch für Geologie und Paläontologie, Abhandlungen 138:15–36.

Hemmer H. 1972. *Uncia uncia*. The American Society of Mammalogists 20:1–5.

Hemmer H. 1977. Die Carnivorenreste (mit Ausnahme der Hyänen und Bären) aus den jungpleistozänen Travertinen von Taubach bei Weimar. Quartärpaläontologie 2:379–387.

Hemmer H. 1978. Die Feliden- und Canidenreste aus des jungpleistozänen Travertinen von Burgtonna in Thüringen. Quartärpaläontologie 3:155-162.

Hilpert B., Kaulich B, Rosendahl W. 2005. Die Zoolithenhöhle bei Burggaillenreuth (Fränkische Alb, Süddeutschland). Forschungsgeschichte, Geologie, Paläontologie und Archäologie. Neue Forschungen zum Höhlenbären in Europa 45:259–304.

Hodder I. 2006. The leopard’s tale: revealing the mysteries of Çatalhöyük. Thames & Hudson, New York, 288 pp.

Hofreiter M. 2002. Genetic stability and replacement in late Pleistocene cave bear populations. Abhandlungen zur Karst- und Höhlenkunde 34:64–67.

Hohenstein UT, Di Nucci A, Moigne A-M. 2009. Mode de vie à Isernia La Pineta (Molise, Italie). Stratégie d’exploitation du *Bison schoetensacki* par les groupes humains au Paléolithique inférieur. L’Anthropologie 113(1):96–110.

Hörmann K. 1933. Die Petershöhle bei Velden in Mittelfranken eine altpaläolithische Station. Abhandlungen der Naturhistorischen Gesellschaft zu Nürnberg 24(2):1–90.

Iñigo C, Molero G, Maldonado E. 1998. Los carnívoros del yacimiento pleistoceno de Cueva del Búho (Segovia, España) y sus huellas de actividad. Estudios Geologicos 54:65–73.

Issel A. 1878a. Nuove richerche sulle caverne ossifere della Liguria. Atti of the Royal Accademia dei Lincei, Classe di scienze fisiche, matematiche e naturali serie B 3(2):51-116.

Issel A. 1878b. Di alcune fiere fossili del Finalese. Giornale Ligustico di Scienze, Lettere ed Arti 2:254-602.

Issel A. 1892. Liguria geologica e prehistorica II. A. Donath, Genova, 376 pp.

Jánossy Dv. 1962. Vorläufige Mitteilung über die Mittelpleistozäne Vertebratenfauna der Tarkö-Felsnische (NO-Ungarn, Bükk-Gebirge). Annales Historico-Naturales Musei Nationalis Hungarici, Pars Mineralogica et Palaeontologica 54:155-176.

Jánossy Dv. 1963. Letzinterglaziale Vertebratenfauna aus der Kalman Lambrecht Höhle (Bükk-Gebirge, Nordost Ungarn). Teil I. Acta Zoologica Academiae Scientiarum Hungaricae 9(3-4):293-331.

Jánossy Dv. 1964. Letzinterglaziale Vertebratenfauna aus der Kalman Lambrecht Höhle (Bükk-Gebirge, Nordost Ungarn) Teil II. Acta Zoologica Academiae Scientiarum Hungaricae 10(1-2):139-195.

Jánossy Dv. 1969a. Stratigraphische Auswertung der europäischen mittelpleistozänen Wirbeltierfauna. Teil I. Berichte der deutschen Geselschaft für geologische Wissenschaft, Abteilung A, Geologie und Paläontologie 14(4):367-438.

Jánossy Dv. 1969b. Stratigraphische Auswertung der europäischen mittelpleistozänen Wirbeltierfauna. Teil II. Berichte der deutschen Geselschaft für geologische Wissenschaft, Abteilung A, Geologie und Paläontologie 14(5):573-643.

Jánossy Dv. 1976a. Die revision jungmittelpleistozäner Vetrebratenfaunen in Ungarn. Fragmenta Mineralogica et Palaeontologica 7:29-54.

Jánossy Dv. 1976b. Die Felsnische Tarkö. Beschreibung der Fundstelle und der Vertebratenfauna. Karszt és Barlangkutatás 8:3-106.

Jánossy Dv. 1986. Pleistocene vertebrae faunas of Hungary. Akademiai Kiado, Budapest.

Johnson WE, O’Brien SJ. 1997. Phylogenetic reconstruction of the Felidae using 16S rRNA and NADH-5 mitochondrial genes. Journal of Molecular Evolution 44:98–116.

Johnson WE, Eizirik E, Pscon-Slattery J, Murphy WJ, Antunes A, Teeling E, O’Brien SJ. 2006. The Late Miocene radiation of modern Felidae: a genetic assessment. Science 311:73–77.

Kahlke HD. 1958. Die jungpleistozänen Säugetierfaunen aus dem Travertingebiet von Taubach-Weimar-Ehringsdorf. Vorbericht. Alt-Thüringen 3:97–130.

Kahlke HD. 1961. Revision der Säugetierfaunen der klassischen deutschen Pleistozän-Fundstellen von Süßenborn, Mosbach und Taubach. Geologie 10(4-5):493–532.

Khorozyan I, Baryshnikov GF, Abramov AV. 2006. Taxonomic status of the leopard *Panthera pardus* (Carnivora, Felidae) in the Caucasus and adjacent areas. Russian Journal of Theriology 5(1):41–52.

Klein R, Cruz-Uribe K. 1985. La fauna mamífera del yacimiento de la cueva de El Juyo. Campañas de 1978 y 1979. In: Barandiarán I, Freeman LJ, González J, Klein R. (Eds.), Excavaciones en la cueva de El Juyo. Monografías Centro de Investigación y Museo de Altamira 14:99–120.

Koby FE. 1946. A propos des grand chats des caverns. Eclogae Geologicae Helvetiae 39(2):367–371.

Koby FE. 1959. Note sur deux lynx Magdaléniens de la grotte de La Vache (Pyrénées). Eclogae Geologicae Helvetiae 52:949–953.

Koby FE. 1964a. La faunule de la Grotte de Néron, à Soyons (Ardêche). Miscelánea en homenaje al Abate Henri Breuil 1964:473–486.

Koby FE. 1964b. Die Tierreste der drei Bärenhöhlen. In: Andrist D, Flükiger W, Andrist A. (Eds.), Das Simmental zur Steinzeit. Acta Bernensia 3:149–160.

Koenigswald Wv, Nagel D, Menger F. 2006. Ein jungpleistozäner Leopardenkiefer von Geinsheim (nördliche Oberrheinebene) und die stratigraphische und ökologische Verbreitung von *Panthera pardus*. Neues Jahrbuch für Geologie und Paläontologie Monatshefte 2006(5):277–297.

Koenigswald Wv, Schmidt-Kittler N. 1972. Eine Wirbeltierfauna des Riß/Würm-Interglazials von Erkenbrechtsweiler (Schwäbische Alb, Baden-Württemberg). Mitteilungen der Bayerischen Staatssammlung für Paläontologie, Historie und Geologie 12:143-147.

Koken E. 1909. Diluvialstudien. Neues Jahrbuch für Geologie und Paläontologie, Monatshefte 1909:57-90.

Koby FE, Spahni JC. 1956. Découverte dans le Quaternaire espagnol d’un petite Hamster. *Allocricetus bursae* Schaub. Eclogae Gelogicae Helvetiae 49:543–545.

Kormos T. 1912. Az ősember első nyomai a Karszt-hegységben. Földtani Közlöny 42(1):47-54.

Kotsakis T, Barisone G. 2008. Cenni sui vertebrati fossili di Roma. In: Funiciello R, Praturlon A, Giordano G (Eds), La Geologia di Roma. Memorie Descrittive della Carta Geologica d’Italia 80:115–143.

Kotsakis T, Palombo MR. 1979. Un cranio di *Panthera pardus* (L.) del Pleistocene medio superiore di monte sacro (Roma). Geologica Romana 18:137–155.

Koumouzelis M, Ginter B, Kozlowski JK, Pawlikowski M, Bar-Yosef O, Albert RM, Lityńska-Zając M, Stworzewicz E,Wojtal P, Lipecki G, Tomek T, Bocheński ZM, Pazdur A. 2001. The Early Upper Palaeolithic in Greece: the excavations in Klisoura Cave. Journal of Archaeological Science 28:515–539.

Kretzoi M. 1938. Die Raubtiere von Gombaszök nebst einer Übersicht der Gesamtfauna. Annales Historico Nationalis Museo Hungarici, Pars Mineralogica, Geologica, Paleontologica 31:88–157.

Kurtén B. 1968. Pleistocene Mammals of Europe. London, pp. 317.

Kríž M. 1891. Die Höhlen in der mährischen Devonkalken und ihre Vorzeit. Teil I. Jahrbuch der Kaiserischen-Königlichen Geologischen Reichsanst 41:443-570.

Kríž M. 1892. Die Höhlen in der mährischen Devonkalken und ihre Vorzeit. Teil II. Jahrbuch der Kaiserischen-Königlichen Geologischen Reichsanst 42:463-626.

Križ M. 1893. Die Höhlen in den Mährischen Devonkalken und ihre Vorzeit. Jahrbuch der Kaiserischen-Königlichen Geologischen Reichsanstalt 41:443-627.

Lartet E. 1867. Note sur deux tetes decarnassiers fossiles (*Ursus* et *Felis*) et sur quelques debris de rhinocéros provenent des découvertes faites par M. Bourguignat dans les cavernes du midi de la France. Annales de la Science Naturelle 5(8):157–194.

Lortet MD, Chantre ME. 1872. Études paléontologiques dans le bassin du Rhône Période Quaternaire. Publications du Musée des Confluences 1:59–130

Leonardi P. 1935. Nuovi resti di mammiferi pleistocenici della caverna Pocala. Atti Museum Civico Storia Naturale Trieste 13(1):4–5.

Liebe KT. 1879. Die fossile Fauna der Höhle Vypustek in Mähren nebst Bemerkungen betreffs einiger Knochenreste aus der Kreuzberghöhle in Krain. Sitzungsberichte der Kaiserlichen Akademie der Wissenschaften, Mathematisch-Naturwissenschaftlichen, Abteilung I, Biologie, Mineralogie, Erdkunde 79:472–490.

Lioubine VP, Tcherniachovski AG, Barychnikov GF, Levkovskaia GM, Selivanova NB. 1985. La grotte de Koudaro 1 (Résultats de recherches pluridisciplinaires). L’Anthropologie 89:159–180.

Litt T, Behre K-E, Meyer K-D, Stephan H-J, Wansa S, 2007. Stratigraphisch Begriffe für das Qoartär des norddeutschen Vereisungsgebietes. Eiszeitalter und Gegenwart 56(1–2):7–65.

Lumley Hd, Fournier A, Park YC, Yokoyama Y, Demouy A. 1984. Stratigraphie du remplissage pléistocène moyen de la Caune de l’Arago à Tautavel. Étude de huit carrotages effectués de 1981 à 1983. L’Anthropologie 88(1):5–18.

Lumley Hd, Kahlke HD, Moigne A-M, Moulle P-E. 1988. Les faunes de grands mammifères de la grotte du Vallonet, Roquebrune-Cap-Martin, Alpes-Maritimes. L’Anthropologie 92(2):465–496.

Lumley-Woodyear Hd. 1969. Le Paléolithique inférieur et moyen du Midi méditerranéen dans son cadre géologique. Gallia Préhistoire 5(1):1–467.

Madurell-Malapeira J, Ros-Montoya S, Espigares MP, Alba DM, Aurell-Garrido J. 2014. Villafranchian large mammals from the Iberian Peninsula: paleobiogeography, paleoecology and dispersal events. Journal of Iberian Geology 40(1):167–178.

Malez M. 1961. Oberpleistozäne Schachtfauna in Pisana Stina auf dem Opor-Gebirge (Dalmatien). Bulletin Scientifique 6(1):xxx.

Malez M. 1963. Kvartarna fauna pećine Veternice u Medvednici. Palaeontologia Jugoslavica 5:1–197.

Malez M. 1970. Die Ergebnisse der Revision der Pleistozänen Fauna aus Krapina. In: Malez M. (Ed.), Krapina 1899-1969. Mladost, Zagreb, pp. 45–56.

Malez M. 1986. Kvartarni sisavci (Mammalia) iz velike pećine na Ravnoj gori (SR Hrvatska, Jugoslavija). Rad Zavoda za znanstveni rad Jugoslavenske akademije znanosti i umjetnosti 1:33–139.

Malez M, Pepeonik Z. 1969. Entdeckung des ganzen Skelettes eines fossilen Leoparden in der Vjetrenica-Höhle auf dem Popovo Polje (Herzegowina). Bulletin Scientifique, Section A 14(5–6):144–145.

Malez M, Sliepcevis A, Srdoc D. 1979. Die Altersbestimmung von Quartärablagerungen an 20 Lokalitäten im Dinarischen Karst nach der Radiokohlenstoff-Methode. Rad Jugoslavenske akademije znanosti i umjetnosti 18:227–271.

Maluquer de Motes J. 1957. La industria lítica de Olazagutía. Excavaciones en Navarra 5:43–86.

Marciszak A, Krajcarz MT, Krajcarz M, Stefaniak K. 2011. The first record of leopard *Panthera pardus* Linnaeus, 1758 from the Pleistocene of Poland. Acta Zoologica Cracoviensia Series A Vertebrata 54(1–2):39–46.

Mariezkurrena K. 1987. Macromamíferos asociados a los enterramientos calcolíticos de la cueva Iruaxpe I (Guipúzcoa). Munibe 39:80–84.

Mariezkurrena K. 2011. Hallazgos de macromamíferos poco frecuentes en yacimientos arqueológicos y paleontológicos del Pleistoceno de la Región Cantábrica. Kobie Serie Paleoantropologie 30:83–110.

Marín-Arroyo AB. 2009. A comparative study of analytic techniques for skeletal part profile interpretation at El Mirón Cave (Cantabria, Spain). Archaeofauna 18:79–98.

Maroto J. 1993. La cueva de los Ermitons (Sales de Llierca, Girona): un yacimiento del Paleolítico medio final. Espacio Tiempo y Forma. Serie I, Prehistoria y Arqueología 6:13–30.

Maroto J, Soler N, Mir A. 1987. La cueva de Mollet I (Serinyà, Gerona). Cypsela 6:101–110.

Martínez R. 1996. Fauna del Pleistoceno superior en el País Valenciano: aspectos económicos, huella de manipulación y valoración paleoambiental. Tesis doctoral inédita. Universitat de València.

Martínez R. 2009. Restos óseos de macromamíferos y aves. In: Villaverde V, Pérez J, Lledó JC. (Eds.), Los primeros pobladores de La Costera: los neandertales de la Cova Negra de Xàtiva. Historia de Xàtiva. Prehistoria, Arqueología y Antigüedad, vol. I. Universitat de València, Xàtiva, pp. 59–83.

Masseti M, Salari L. 2012. La scomparsa dei grandi carnivori toscani nel tardo Quaternario. Atti VI Convegno Nazionale di Archeozoologia, Orecchiella 2009, pp. 41–46

Maviglia C. 1952. Le cosidette “fibbie” del Musteriano alpino rinvenute a Sambughetto Valstrona (Novara). Atti del 1. Congresso Internazionale di Studi Liguri. Monaco, Bordighera, 10–17.4.1950, Bordighera, pp. 52-57.

Mazák JH. 2004. On the sexual dimorphism in the skull of the tiger (*Panthera tigris*). Mammalian Biology 69:392–400.

Mazák JH, Christiansen P, Kitchener AC. 2011. Oldest known pantherine skull and evolution of the tiger. PLoS One 6(10):25483.

Mazo C, Utrilla P, Blasco F, Mandado J, Torres T, Ortiz E, Rink WJ. 2011e2012. El nivel musteriense de la Cueva de Abauntz (Arraitz, Navarra) y su aportación al debate “Vasconiense”. Mainake 33:187–214.

Meijaard E. 2004. Biogeographic history of the Javan leopard *Panthera pardus* based on craniometric analysis. Journal of Mammalogy 85(2):302–310.

Meloro C, Raia P, Barbera C. 2006. Grotta Milano, una trappola per carnivori sui monti Alburni. Montagna e Scienza. Sentiero degli del l’Appenino Meridionale 3(1):71–80.

Menéndez M,Weniger G-Ch, Álvarez-Alonso D, De Andrés-Herrero M, García E, Jordá JF, Kehl M, Rojo J, Quesada JM, Schmidh I. 2014. La Cueva de la Güelga. Cangas de Onís. Asturias. In: Sala R, Carbonell E, Bermúdez de Castro JM, Arsuaga JL. (Eds.), Los cazadores recolectores del Pleistoceno y del Holoceno en Iberia y el Estrecho de Gibraltar. Estado actual del conocimiento del registro arqueológico. Universidad de Burgos y Fundación Atapuerca, pp. 60–63.

Michel P. 2005. Un repaire würmien d’hyénes des cavernes: La Grotte d’Unikoté (Iholdy, Pyrénées-Atlantiques, France). Monografías 20:131–150.

Miculinić K. 2012. Fossil remains of leopard (*Panthera pardus*) from Vjetrenica Cave, Popovo polje. Phd Thesis. Zagreb University, Zagreb.

Miracle PT, Brajkovic D. 2010. The palaeoecological significance of the Pleistocene mammalian fauna from Veternica Cave, Croatia. Revison of the lagomorpha, canidae, mustelidae and felidae. Geologica Croatica 63(2):207–224.

Mochi A. 1911. Faune Riss-Würmiana, Würmiana e Post-Würmiana e industriea paleolotica superiore nella Grotta di Cucigliana (Monti Pisani). Rivista Antrhropologica 16(2–3):259–272.

Moigne A-M, Palombo MR, Belda V, Heriech-Briki D, Kacimi S, Lacombat F, de Lumley AM, Moutoussamy J, Rivals F, Quiles J, Testu A. 2006. Les faunes de grands mammiferes de la Caune de l’Arago (Tautavel) dans le cadre biochronologique des faunes du Pléistocène moyen Italien. L’Anthropologie 110(5):788–831.

Molero G, Maldonado E, Iñigo C, Sánchez F, Díez A. 1989. El yacimiento del Pleistoceno superior de la Cueva del Búho (Perogordo, Segovia) y su fauna de Vertebrados. Volumen de Comunicaciones de las V Jornadas de Paleontología, Valencia, p. 101–102.

Moncel M-H, Brugal J-P., Prucca AG. 2008. Lhomme. Mixed occupation during the Middle Palaeolithic: case study of a small pit-cave-site of Les Pêcheurs (Ardèche, south-astern France). Journal of Anthropological Archaeology 27:382–398.

Moncel M-H, Crégut-Bonnoure É, Daujeard C, Lartigot A-S, Lebon M, Puaud S, Boulbes N, Croizet S. 2008. Le site de la baume Flandin (commune d’Orgnac-l’Aven): nouvelles données sur ce gisement du Paléolithique moyen. Comptes Rendus Palevol 7:315–325.

Montgomery S, Bishop N. 2012. Saving the ghost of the mountain: an expedition among snow leopards in Mongolia. Houghton Mifflin Harcourt, p. 80.

Mottl M. 1939. Die Fauna der Mussolini-Höhle (Subalyuk), Bükk-Gebirge, Ungarn. Geologica Hungarica, Series Palaeontologica 14:227–340.

Mottl M. 1951. Die Repolusthöhle bei Peggau (Steiermark) und ihre eiszeitlichen Bewohner (mit einem Beitrag von V. Maurin). Archaeologica Austriaca 8:1–78.

Mottl M. 1953. Die Erforschung der Höhlen. In: Mottl M, Murban K. (Eds) Eiszeitforschungen des Joanneums in Höhlen der Steiermark. Mitteilungen des Museums für Bergbau, Geologie und Technik am Landesmuseum Joanneum 11:14–58.

Moulle PE, Echassoux A, Lacombat F., Descleaux, E., Bailon, S., 2005. L’environnement animal des premiers habitants de l’Europe méditerrranéenne: les grands mammifères contemporaines de l’homme du Vallonet, données taxonnomiques et biostratigraphiques por la deuxième moité du Pléistocène inférieur. British International Archaeological Reports Series 1364:105–113.

Mourre V, Sandrine C, Thiébaut C, Allard M, Bruxelles L, David C, Cravinho S, Jeannet M, Juillard F, Laroulandie V, Maureille B. 2008. Le site moustérien de la Grotte du Noisetier à Fréchet-Aure (Hautes-Pyrénées) - premiers résultats des nouvelles fouilles. Mémoire de la Société préhistorique française 47:189-202.

Mourre V, Thiébaut C, Boudadi-Maligne M, Cravinho S, Mallol C, Mallye J-B, Viguier J. 2009. Le site moustérien de la Grotte du Noisetier à Fréchet-Aure (Hautes-Pyrénées) Sous-titre: Fouille programmée pluriannuelle 2008-2010. Deuxième rapport intermédiaire 1:1-70.

Musil R. 1965. Zhodnocení dřívějších palaeontologickýchnálezů u Šipky. Anthropos 17(9):127–134.

Musil R. 2003. The Middle and Upper Palaeolithic game suite in central and southeastern Europe. In: van Andel T, Davies W. (Eds), Nenderthals and modern humans in the European landscape during the last glaciation. McDonald Institute for Archaeological Research, Cambridge, pp. 167–190.

Musil R. 2008. The palaeoclimatic and palaeoenvironmental conditions at Předmostí. In: Velemínská J, Brůžek J. (eds), Early modern humans from Předmostí. A new reading of old documentation. Academia, Praha, pp. 15–20.

Musil R. 2018. Phenological analysis of the Last Glacial vertebrates from the territory of Moravia (the Czech Republic). Continuity and change in faunistic communities. Fossil Imprint 74(3–4):199–236.

Münzel SC, Stiller M, Hofreiter M, Mittnik A, Conard NJ, Bocherens H. 2011. Pleistocene bears in the Swabian Jura (Germany): Genetic replacement, ecological displacement, extinctions and survival. Quaternary International 245:225–237.

Myers N. 1980. The Leopard *Panthera pardus* in Africa. Bernan Press, p. 79.

Nadal J, de Haro S, Maroto J. 2002. Els grans mamífers del Plistocè superior. Quaderns 23:155-180.

Nagel D. 1995. Die felidenreste aus dem Jungpleistozän von Vraona Griechenland. In: Symeonidis N, Rabeder G. (Eds.), Das Jungpleistozän in der “Höhle” von Vraona auf Attica in Griechenland. Annales Géologiques des Pays Helléniques 36:60–102.

Nagel D. 1997. *Panthera pardus* und *Panthera spelaea* (Felidae) aus der Höhle von Merkenstein, Niederösterreich. Wissenschaftliche Mitteilungen des Niederösterreichischen Landesmuseums 10:215–224.

Nagel D. 1999. *Panthera pardus vraonensis* n. ssp., a new leopard from the Pleistocene of Vraona/Greece. Neues Jahrbuch für Geologie und Palaontologie Monatshefte 1999(3):129–150.

Naples VL, Rothschild B. 2012. Sex determination in lions (*Panthera leo*, Felidae): a novelmethod of distinguishing male and female skulls. Mammalia 76(1):99–103.

Nolte. E. 1966. Nuevos yacimientos prehistóricos en cuevas vizcaínas. Anuario de Euskofolklore 21:189–216.

Nolte. E. 1968. Catálogo de simas y cuevas de la Provincia de Vizcaya. Public. Diputac. de Vizcaya. Bilbao.

Obermaier H. 1925. El hombre fósil. Comisión de Investigaciones Paleontológicas y Prehistóricas, Serie Prehistórica 9:1-457.

Oli MK, Taylor IR, Rogers ME. 1993. Diet of the snow leopard (*Panthera uncia*) in the Annapurna Conservation area, Nepal. Journal of Zoology 231:365–370.

Otte M, Yalcinawka I, Kozłowski J, Taskiran H, Bar-Yosef O. 1996. Paléolithique ancien de Karain (Turquie). Anthropologie et Préhistoire 107:149–156.

Pacher M, Stuart AJ. 2008. Extinction chronology and palaeobiology of the cave bear (*Ursus spelaeus*). Boreas 38 (2):189–206.

Paijmans JLA, Barlow A, Förster DW, Henneberger K, Meyer M, Nickel B, Nagel D, Havmøller RW, Baryshnikov GF, Joger U, Rosendahl W, Hofreiter M. 2018. Historical biogeography of the leopard (*Panthera pardus*) and its extinct Eurasian populations. BMC Evolutionary Biology 18:156.

Palmquist P, Torregrosa V, Pérez-Claros JA, Martínez-Navarro B, Turner A. 2007. A re-evaluation of the diversity of *Megantereon* (Mammalia, Carnivora, Machairodontidnae), and the problem of species identification in extinct carnivores. Journal of Vertebrate Paleontology 27(1):160–175.

Pantoja A, Sala MTN, García N, Ruiz B, Gil MJ, Aranburu A, Arsuaga JL, Casabó J. 2011. Análisis paleontológico del yacimiento del Pleistoceno superior de Cova Foradada (Xàbia, Alicante, España). Boletín de la Real Sociedad Española de Historia Natural Sección Geológica 105(1–4):53–66.

Pasa A. 1947. I mammiferi di alcune antiche brecce veronesi: Museo Civico di Storia Naturale di Verona 1:1–111.

Passemard E. 1913. Fouilles de la Grotte d’Isturitz (Basses Pyrénées). Bulletin de la Société préhistorique Ariège-Pyrénées 10:647–649.

Passemard E. 1920a. L’Abri Olha (Basses Pyrénées). Association Française pour l'Avancement des Sciences. Congrès de Strasbourg. Rapport présenté le 28 juillet 1920.

Passemard E. 1920b. Sur la persistence de *Rhinoceros mercki* dans un gisement Moustérienne Supérieur des Basses Pyrénées. Comptes Rendus de l’Académie des sciences 171–172:112–123.

Passemard E. 1921a. La caverne d’Isturitz (Basses-Pyrénées). Revue Archéologique 15:1–45.

Passemard E. 1921b. Note préliminaire sur les terrasses alluviales de la Nive et leurs rapports avec l’Abri Moustérien d’Olha. Comtes rendues de l’Academie des Sciences 172:145–179.

Passemard E. 1924. Les Stations Paléolithiques du Pays Basque et leurs rélations avec les terrasses d'alluvions de la Nive. L. Bodiou, Bayonne, 220 pp.

Passemard E. 1936. Le Moustérien a l’Abri Olha en Pays Basque. Revue Lorraine d’Anthropologie 8:117–160.

Passemard E. 1944. La caverne d’Isturitz en Pays Basque. Prehistoire 9:1–95.

Patou-Mathis M. 1994. Archéozoologie des niveaux moustériens et aurignaciens de la grotte Tournal à Bize (aude). Gallia Préhistoire 36:1–64.

Pautret-Homerville C, Argant A, Combier J, Gély B, Argant J. 2011. La grotte aux ours de Châteaubourg (Ardèche, France): synthèse sur un gisement découvert il y a un siècle et demi. Quaternaire, Hors-série 4:185–199.

Pavšic J, Turk I. 1989. Prva najdba *Panthera pardus* (Linné) in nove najdbe vrste *Gulo gulo* Linné v Sloveniji. Razprave Slovenska Akademija Znanosti in Umetnosti, Razred za Naravoslovne Vede 30(4):130–151.

Pérez M. 1977. Los mamíferos del yacimiento musteriense de Cova Negra. Servicio de Investigación Prehistórica de la Diputación de Valencia, Serie de Trabajos Varios 53:1–165.

Petronio C, Bellucci L, Martiinetto E, Pandolfi L, Salari L. 2011. Biochronology and palaeoenvironmental changes from the Middle Pliocene to the Late Pleistocene in Central Italy. Geodiversitas 33(3):485–517.

Philippe M, Fosse P. 2003. La faune de la grotte Chauvet (Vallon-Pont-d’Arc): présentation préliminaire paléontologique et taphonomique. Paléo 15:123–140.

Pidoplichko IG. 1951. O lednikovom periode. Izdatelstvo Akademii Nauk Ukrayinska Radyanska Sotsialistychna Respublika: Kiev.

Pidoplichko IG. 1956. Vklad v poznaniye ischeznuvshey fauny Ukrainskoy SSR. Proceedings of Ukrainian Academy of Science, Kiev.

Pillard B. 1972. La faune es grand mammifères du Wuermian II de la grotte de l’Hortus. Etudes de Quarternaire 1:163–205.

Pitti C, Tozzi C. 1971. La Grotta del Capriolo e la Buca della Iena presso Mommio (Camaiore, Lucca). Rivista Scienze Preistoriche 26:213–258

Poljak J. 1914. Pećine hrvatskog krša III. Pećine okoliša Plitvičkih jezera, Drežnika i Rakovice. Prirodoslovnog istraživanja Hrvatske i Slavonije Jugoslavenska akademija znanosti i umjetnosti 3:22-124.

Quam RM, Arsuaga JL, Bermúdez de Castro J-M, Díez JC, Lorenzo C, Miguel J, García CN, Ortega AI. 2001. Human remains from Valdegoba Cave (Huérmeces, Burgos, Spain). Journal of Human Evolution 41:385–435.

Rabeder G. 2003. Der Panther vom Steinfeld. Die neuesten Ergebnisse der Grabung in der Ochsenhalthöhle. Unser Weißenbach 4:15.

Rasines del Río P, Muñoz E, Santamaría S, Morlote JM, Gutiérrez I. 2011. Aproximación paleoambiental al nivel XIII (Auriñaciense) del Abrigo del Cuco (Castro Urdiales. Cantabria). Kobie Serie Paleoantropologie 30:31–42.

Regalia OE. 1911. Fauna glaciale in due grotte di Equi (Alpi, Apuana). Rivista Italiana Palaeontologia 17:24–28.

Ripoll MP. 1982. La fauna. In: Aparicio J, Pérez M, Vives E, Fumanal MP, Dupré M. (Eds.), La Cova de les Calaveres (Benidoleig, Alicante). Diputació de València, Servicio de Investigación Prehistórica, Serie de trabajos varios 75:41–47.

Rivals F. 2004. Les petits bovidés (Caprini et Rupicaprini) pléistocènes dans le bassin méditerranéen et le Caucase. Etude paléontologique, biostratigraphique, archéozoologique et paléoécologique. Bar International Series 1327:1–252.

Rivals F., Arellano A. 2010. Les faunes des sites du Pléistocène supérieur du Caucase méridional: Grotte de Sakažhia, Grotte d’Ortvala et Grotte du Bronze (République de Géorgie). L’Anthropologie 114:305–323.

Rodríguez J, Giles F, Riquelme JA. 2010. El registro fósil de hienas en las cuevas de Gorham's y Vanguard (Gibraltar): contexto paleogeográfico. Zona Arqueológica 13:354–365.

Rosado-Méndez NY, Lloveras L, Daura J, Nadal J, Sanz M. 2015. Predator agents and leporid accumulations: the case of Terrasses de la Riera dels Canyars (Gavà, Barcelona, Spain). Journal of Archaeological Method and Theory 22:980–1005.

Rosendahl W. 1998. Paläontologische Rarität aus der Baumannshöhle bei Rübeland im Harz - über jungpleistozäne Höhlenleopardenfunde aus den Jahren 1887-1901. Mitteilungen des Verbandes der deutschen Höhlen- und Karstforscher 40(2):53.

Royo J. 1942. Cova Negra de Bellús. II. Relación detallada del material fósil. Servicio de Investigación Prehistórica de la Diputación de Valencia, Serie de Trabajos Varios 6:14–18.

Rozhnov VV, Lukarevsky VS, Sorokin PA. 2011. Use molecular-genetics characteristics for reintroduction of leopard (*Panthera pardus* L., 1758) in the Caucasus. Doklady Academii Nauk 437, 280–285.

Rüger L. 1928. Beiträge zur Kenntnis der altdiluvialen Fauna von Mauer und der Elsenz und Eberbach am Neckar - Carnivora und Rodentia. Neues Jahrbuch für Mineralogie, Geologie und Paläontologie Abhandlungen Neue Serie 16:197–232.

Ruiter dDJ, Berger LR. 2000. Leopards as taphonomic agents in dolomitic caves-implications for bone accumulations in the hominid-bearing deposits of South Africa. Journal of Archaeological Science London 27:665–684.

Ruiter dDJ, Berger LR. 2001. Leopard (*Panthera pardus* Linnaeus) cave caching related to anti-theft behaviour in the John Nash Nature Reserve, South Africa. African Journal of Ecology 39:396–398.

Ruiz de Gaona M. 1945. Resultados de una exploración en las cavernas prehistóricas de Txispiri-Gaztelu (Guipúzcoa). Boletino Real Sociedad Bascongada de los Amigos del País 1:157–402.

Ruiz de Gaona M. 1952. Noticia del hallazgo y destrucción del yacimiento Paleolítico Superior más importante de Navarra. Actas del Primer Congreso Internacional de Estudios Pirenáicos 4(3):157–168.

Ruiz de Gaona M. 1958. Todavía algo sobre el yacimiento de Coscobilo (Olazagutía). Príncipe de Viana 72–73:279–287.

Rustioni M, Mazza P, Balestri M. 1999. The Middle-Late Pleistocene fauna from Montagnoso (Leghorn, central Italy). Il Quaternario 12(1):105–111.

Sabol M, Troco DPE. 2017. First fossil record of leopard-like felid (*Panthera* cf. *pardus*) from alluvial deposits of the Po River in northern Italy. Quaternary International 436A:192–200.

Sadier B, Delannoy J, Benedetti L, Bourlès D, Jaillet S, Geneste J, Lebatard A, Arnold M. 2012. Further constraints on the Chauvet Cave artwork elaboration. Proceedings of the Natural Academy of Science USA 109(21):8002–8006.

Saint-Périer dR. 1930. La Grotte d’Isturitz I. Le Magdalénien de la Salle de Saint Martin. Archives de l’Institut de paléontologie humaine mémoire 7:1-124.

Saint-Périer dR. 1936. La Grotte d’Isturitz II. Le Magdalénien de la Grande Salle. Archives de l’Institut de paléontologie humaine mémoire 17:1-74.

Saint-Périer dR. 1965. Réflexions sur le Paléolithique Supérieur d’Isturitz. Miscelánea Homenaje al Abate Breuil. 2:319-326.

Saint-Périer dR, Saint-Périer ds. 1952. La Grotte d’Isturitz III. Les Solutréens, les Aurignaciens et les Moustériens. Archives de l’Institut de paléontologie humaine mémoire 25:319–325.

Sala B. 1980. Interpretazione crono-bio-stratigrafica dei depositi pleistocenici della Grotta del Broion (Vicenza). Geografia Fisica e Dinamica Quaternaria 3:65–71.

Sala B. 1992. I mammiferi del Quaternario italiano. In: Tugnoli C. (Ed.), I segni del tempo-Memoria delle origini ed icone del primordiale. Atti del corso di aggiornamento per personale docente, Trento, pp. 209–227.

Sala MTN, Arsuaga JL, Laplana C, Ruiz B, Gil MJ, García N, Aranburu A, Algaba M. 2011. Un paisaje de la Meseta durante el Pleistoceno Superior. Aspectos paleontológicos de la Cueva de la Zarzamora (Segovia, España). Boletín de la Real Sociedad Española de Historia Natural Sección Geológica 105(1–4):67–85.

Sala MTN, Algaba M, Arsuaga JL, Aranburu A, Pantoja A. 2012. A taphonomic study of the Búho and Zarzamora caves. Hyenas and humans in the Iberian plateau (Segovia, Spain) during the Late Pleistocene. Journal of Taphonomy 10(3–4):477–497.

Salles LO. 1992. Felid phylogenetics: extant taxa and skull morphology (Felidae, Aeluroidea). American Museum Novitates 3047:1–67.

Sanei A, Zakaria M, Hermidas S. 2011. Prey composition in the Persian leopard distribution range in Iran. Asia Life Sciences Supplement 7:19–30.

Sarrión I. 1984. La fauna del Würm superior de la Cueva Merino (Dos Aguas, Valencia). Lapiaz 13:31–36.

Sarrión I. 1990. El yacimiento del Pleistoceno medio de la Cova del Corb (Ondara, Alicante). Archivo de Prehistoria Levantina 20:43–77

Sauqué S, Cuenca-Bescós G. 2013. The Iberian Peninsula, the last European refugium of *Panthera pardus* Linnaeus 1758 during the upper Pleistocene. Quaternaire 24(1):35–48.

Sauqué V, Garcıá-González R, Cuenca-Bescós G. 2014a. A Late Pleistocene (MIS 3) ungulate mammal assemblage (Los Rincones, Zaragoza, Spain) in the Eurosiberian-Mediterranean boundary. Historical Biology 28(4):1–26.

Sauque V, Rabal-Garcés R, Cuenca-Bescós G. 2014b. Carnivores from Los Rincones, a leopard den in the highest mountain of the Iberian range (Moncayo, Zaragoza, Spain). Historical Biology 28(4):479–506.

Sauqué V, Rabal-Garcés R, Sola-Almagro C, Cuenca-Bescós G. 2014c. Bone accumulation by leopards in the Late Pleistocene in the Moncayo massif (Zaragoza, NE Spain). PLoS One 9(3):92144.

Sauqué V, Galán J, Núñez-Lahuerta C, Sola-Almagro C, Rabal-Garcés R, Martínez I, Maxo C, Cuenca-Bescós G. 2014d. Neandertales en el Pleistoceno superior del Valle del Ebro, paleoambiente y evidencias tafonómicas en Aguilón P-7. In: Royo-Torres R. Verdú FJ, Alcalá L. (Eds.), 30. Jornadas de Paleontología de la Sociedad Española de Paleontología 24:223–226.

Schinkel A. 2019. Een hielbeen van het luipaard, *Panthera pardus* (Linnaeus, 1758), gevonden op Maasvlakte 2. Cranium 36(2):69–81.

Schlosser M. 1923. Neue Funde von fossilen Wirbeltieren in Spanien. Centralblatt für Mineralogie, Geologie und Paläontologie 24:657–662.

Schmerling P-Ch. 1833. Ueber die Knochenhölen bei Lüttich. Neues Jahrbuch für Mineralogie, Geognosie, Geologie und Petrefaktenkunde 1:38–48.

Schmerling P-Ch. 1834a. Researches on the fossil bones found in the caves of Liege province, I vol. P. J. Collardin, Liège, 166 pp.

Schmerling P-Ch. 1834b. Researches on the fossil bones found in the caves of Liege province, II vol. P. J. Collardin, Liège, 195 pp.

Schmid E. 1940. Variationstatistische Untersuchungen am Gebiss pleistozäner und rezenter Leoparden und anderer Feliden. Zeitschrift für Säugetierekunde 15:1–179.

Schmid E. 1949. Über einen Leopardenfund von Taubach. Neues Jahrbuch für Mineralogie, Geologie und Paläontologie Monatshefte B 1949:102–108.

Schmidt RR. 1912. Die diluviale vorzeit Deutschlands. E. Schweizerbart, Stuttgart, 283 pp.

Schmidtgen O. 1922. *Felis pardus* spec. L. aus dem Mosbacher Sand. Jahrbuch der Nassauischen Verhandlungen für Naturkunde 74, 51–58.

Schreiber D, Löscher M, Maul L, Unkel I. 2007, Die Tierwelt der Mauerer Waldzeit. In: Wagner GA, Rieder H, Zöller L, Mick E. (Eds.), *Homo heidelbergensis* - Schlüsselfund der Menschheitsgeschichte. Konrad Theiss Verlag, Stuttgart, pp. 127–159.

Schreve DC. 1997. Mammalian biostratigraphy of the later Middle Pleistocene in Britain. University of London, unpublished Ph.D. Thesis. Vol. 1, 380 pp, vol. 2, 410 pp.

Schütt G. 1968. Ein jungpleistozäner Leopardenfund aus der Baumannshöhle im Harz. Mitteilungen aus dem Geologischen Institut der Universität Hannover 8:102–115.

Schütt G. 1969a. *Panthera pardus sickenbergi* aus den Maurer Sanden. Neues Jahrbuch für Geologie und Paläontologie 1969:299–310.

Schütt G. 1969b. Die jungpleistozäne Fauna der Höhlen bei Rübeland im Harz. Quartär 20:79–125.

Sharada CV. 2013. Archaeozoological analyses of large aammals (archaeostratigraphic unit 28) from the prehistoric cave of Lazaret, Nice, France. Master Thesis, Università degli Studi di Ferrara, 127 pp.

Shehzad W, McCarthy TM, Pompanon F, Purevjav L, Coissac E, Riaz T, Taberlet P. 2012. Prey preference of snow leopard (*Panthera uncia*) in South Gobi, Mongolia. PLoS One 7(2):32104.

Simonelli V. 1916. I mammiferi fossili della Caverna di Monte Cucco. Memorie della Reale Accademia delle Scienze dell’Istituto di Bologna 7(3):271–286.

Simonet P. 1992. Les associations de grands mammifères du gisement de la grotte Scladina à Sclayn (Namur, Belgique). In: Otte M. (Ed.), Recherches aux grottes de Sclayn Volume 1: Le contexte. Études et Recherches Archéologiques de l’Université de Liège 27:127–151.

Sims ME. 2005. Identification of mid-size cat skulls. Identification guides for wildlife law enforcement no. 7. USFWS, National Fish and Wildlife Forensics Laboratory, Ashland, pp. 1–4.

Soergel W. 1914. Die diluvialen Säugetiere Badens. Mitteilungen der badischen geologischen Landesanstalt 9:1–254.

Sommer RS, Benecke N. 2006. Late Pleistocene and Holocene development of the felid fauna (Felidae) of Europe: a review. Journal of Zoology 269(1):7–19.

Sorbini L, Pasa DMV. 1974. Le collezioni paleontologiche quaternaire del Museo Civico di Storia Naturale di verona. Museum Civico Storia naturale Verona 1:1–53.

Spassov N, Raychev T. 1997. Late Würm *Panthera pardus* remains from Bulgaria: The European fossil leopards and the question of the probable species survival until Holocene in the Balkans. Historica Naturalis Bulgarica 7:71–96.

Stehlin HG, Dubois A. 1933. La grotte de Cotencher, station mousterienne. Abhandlungen der Schweizer Paläontologischen Gesellschaft 53:179-292.

Stringer C, Finlayson JC, Barton RNE, Cáceres I, Fernández-Jalvo Y. 2008. Neanderthal exploitation of marine mammals in Gibraltar. Proceedings of the National Academy of Sciences of the United States of America 105(38):14319–14324.

Straus L, Altuna J, Jakes M, Kunst M. 1988. New Excavations in Casa da Moura (Serra d’El Rei, Peniche) and at the Abrigos de Bocas (Rio Maior), Portugal. Arqueologia 18:65–95.

Struckmann C. 1884. Über die bisher in der Provinz Hannover und den unmittelbar angrenzenden Gebieten aufgefundenen fossilen u. subfossilen Reste quartärer Säugetiere. Jahresbericht Naturhistorische Gesellschaft Hannover 40–41:48–62

Stuart AJ. 1983. Pleistocene bones caves in Britain and Ireland. A short review. Studies in Speleology 4:9–36.

Sunquist ME, Sunquist FC. 2009. Family felidae (Cats). In: Wilson DE, Mittermeier RA. (Eds.), Handbook of the mammals of the world. Carnivores. Lynx Edicions, Barcelona, pp. 128–130.

Symeonidis Nv, Bachmayer F, Zapfe H. 1977. Eine jungplistozäne Wirbeltierfauna aus der Höhle von Vraóna (Attika, Griechenland). Annalen des Naturhistorischen Museums in Wien 81:221–227.

Tagliacozzo A, Ronadini M, Fiore I, Gala M, Peresani M. 2013. Animal exploitation strategies during the Uluzzian at Grotta di Fumane (Verona, Italy). In: Clark JL, Speth JD. (Eds), Zooarchaeology and modern human origins: human hunting behavior during the Later Pleistocene, vertebrate paleobiology and paleoanthropologie. Springer Science & Business Media, Dordrecht, pp. 129–150.

Testu A. 2006. Etude paléontologique et biostratigraphique des Felidae et Hyaenidae pléistocènes de l’Europe méditerranéenne. PhD thesis, Université Perpignan, Perpignan, pp. 359.

Testu A, Moigne A-M, de Lumley H. 2011. La panthère *Panthera pardus* des niveaux inférieurs de la Caune de l’Arago à Tautavel (Pyrénées-orientales, France) dans le contexte des Felidae (Felidae, Pantherinae) de taille moyenne du Pléistocène Européen. Quaternaire 4:271–281.

Thenius E. 1957. Zur Kenntnis jungpleistozäner Feliden Mitteleuropas. Säugetierkundliche Mitteilungen 5(1):1–4.

Thenius E. 1965. Die Carnivoren Reste aus dem Altpleistozän von Voigtstedt bei Sangerhausen in Thüringen. Paläontologische Abhandlungen A 2:539–564.

Thenius E. 1969. Über das Vorkommen fossiler Schneeleoparden (Subgenus *Uncia*, Carnivora, Mammalia). Säugetierkundliche Mitteilungen 17:234–242.

Thenius E. 1972. Die Feliden (Carnivora) aus dem Pleistozän von Stránská Skálá. In: Musil, R. (Ed.), Stránská Skálá I, 1910-1945. Anthropos 20:121–135.

Topachevskij VA. 1956. The fauna of Ol’biya. Zbomik Trudov Zoologicheskogo Museya 27:61–85.

Toškan B. 2007. Remains of large mammals from Divje babe I: stratigraphy, taxonomy and biometry. In: Turk I. (Ed.), Divje babe I Upper Pleistocene palaeolithic site in Slovenia. Part I: geology and palaeontology. Opera Institutti Archaeologici Sloveniae 13:221–278.

Tournepiche JF. 1996. Les grand mammiferes Pleistocenes de Poitou-Charentes. Paleo 8:109–141.

Tournepiche JF. 2001. Les carnivores de la cave chaude au Bois du Roc (Vilhonneur, Charente). Bulletin L’Association des architectes paysagistes du Canada 30:55–59.

Tozzi C. 1970. La Grotta di S. Agostino (Gaeta). Rivista di Scienze Preistoriche 25(1):1–87.

Tscherski JD. 1892. Wissenschaftliche Resultate der von der kaiserlichen Akademie der Wissenschaften zur Erforschung des Janalandes und der Neusibirischen Inseln in den Jahren 1885 und 1886 ausgesandten Expedition. IV. Beschreibung der Sammlung posttertiärer Säugetiere. Mémoires de l’ Academie Imperial de Science St. Pétersburg 40(1):1–511.

Tsoukala E. 1989. Contribution to the study of the Pleistocene fauna of large mammals (Carnivora, Perissodactyla, Artiodactyla) from Petralona Cave (Chalkidiki, N. Greece). Scientific Annals, School of Geology Aristotle University of Thessaloniki 1(8):1–360.

Tsoukala E. 1999. Quaternary large mammals from the Apidima Caves (Lakonia, S. Peloponnese, Greece). Beiträge zur Paläontologie von Österreich 24:207–229.

Tsoukala E, Chatzopoulou K, Rabeder G, Pappa S, Nagel D, Withalm G. 2006a. Paleontological and stratigraphical research in Loutra Ariedas Bear Cave (Almopia Speleopark, Pella, Macedonia, Greece). Scientific Annals, School of Geology Aristotle University of Thessaloniki 98:41–67.

Tsoukala E, Bartsiokas A, Chatzopoulou K, Lazaridis G. 2006b. Quaternary mammalian remains from the Kitseli Pothole (Alea, Nemea, Peloponnese). Scientific Annals, School of Geology Aristotle University of Thessaloniki 98:273–284.

Turner A. 1984. Dental sex dimorphism in European lions (*Panthera leo* L.) of the Upper Pleistocene: palaeoecological and palaeoethological implications. Annales Zoologici Fennici 21:1–8.

Turner A. 2009. The evolution of the guild of large Carnivora of the British Isles during the Middle and Late Pleistocene. Journal of Quaternary Science 24:991–1005.

Turner A, Antón M. 1997. The big cats and their fossil relatives. An illustrated guide to their evolution and natural history. Columbia University Press, New York, pp. 234.

Uerpmann H-P, Köhler K, Stephan E. 1992. Tierreste aus den neuen Grabungen in Troja. Studia Troica 2:105–121.

Uphyrkina O, Johnson WE, Quigley H, Miquelle D, Marker L, Bush M, O’Brien SJ. 2001. Phylogenetics, genome diversity and origin of modern leopard, *Panthera pardus*. Molecular Ecology 10:2617–2633.

Utrilla P, Montes L, Blasco F, Torres T, Ortega JE. 2010. La cueva de Gabasa revisada 15 años después: un cubil para las hienas y un cazadero para los neandertales. Zona Arqueológica 13:376–391.

Utrilla P, Mazo C. Domingo R. 2014. Fifty thousand years of prehistory at the cave of Abauntz (Arraitz, Navarre): a nexus point between the Ebro Valley, Aquitaine and the Cantabrian corridor. Quaternary International 364:294–305.

Valensi P. 1994. Les grands mammifères de la grotte du lazaret (Nice, Alpes-Maritimes). Étude paléontologique et biostratigraphique des Carnivores. Archézoologie des grandes faunes. PhD Thesis. Museum National d’Histoire Naturelle, Paris, pp. 479.

Valensi P. 2000. The archaeozoology of Lazaret Cave (Nice, France). International Journal of Osteoarchaeology 10:357–367.

Valente MJ. 2004a. Humanos e carnívoros no Paleolítico Superior inicial em Portugal: arqueozoologia e tafonomia da gruta do Pego do Diabo (Loures). Promontoria 2:107–142.

Valente MJ. 2004b. Humans and carnivores in the Early Upper Paleolithic in Portugal: data from Pego do Diabo Cave. Revue de Paléobiologie 23(2):611–626.

Vega del Sella R. 1921. El Paelolítico de Cueva de Morín (Santander) y notas para la climatología cuaternaria del Cantábrico. Trabajos de la Comisión de Investigaciones Paleontológicas y Prehistóricas 29:1–168.

Vega del Sella R. 1930. Las cuevas de la Riera y Balmori (Asturias). Memoires de la Comisión de Investigaciones Paleontológicas y Prehistóricas 13:1–119.

Venzo S. 1954. Osservazioni sulla fauna delle grotticelle di Sambughetto Valstrona e sugli staid würmiani del Lago d’Orta (Novrara). Atti Societa Ittaliana Science Naturale 93(3–4):409–431.

Vértes L. 1965. A barlangi kitöltés szerepe a kormeghatározásban. In: Vértes L. (Ed.), Az õskõkor és az átmeneti kõkor emlékei Magyarországon. Akadémiai Kiadó, Budapest, pp. 270-275.

Vialli V. 1957. I vertebrati della breccia ossifera dell’interglaciale Riss-Würm di Zandobbio (Bergamo). Atti della Società Italiana di Scienze naturali e del Museo Civico di Storia naturale in Milano 96(1–2):51–79.

Villalta JF, Crusafont M. 1950. Un nuevo yacimiento pleistocénico en Castelldefels. Estudios Geológicos 12:275–285.

Villaluenga A, Castaños P, Arrizabalaga A, Mujika JA. 2012a. Cave bear (*Ursus spelaeus* Rosenmüller Heinroth, 1794) and humans during the early Upper Pleistocene (Lower and Middle Palaeolithic) in Lezetxiki, Lezetxiki II and Astigarragako Kobea (Basque country, Spain). Preliminary approach. Journal of Taphonomy 10(3–4):521–543.

Villaluenga A, Arrizabalaga A, Rios-Garaizar J. 2012b. Multidisciplinary approach to two Chatelperronian series: lower IX layer of Labeko Koba and X Level of Ekain (Basque country, Spain). Journal of Taphonomy 10(3–4):499–520.

Viñas R, Villalta JF. 1975. El depósito cuaternario de la “Cova del Gegant”. Speleon, Monografía I, pp. 19–33.

Vinokur IS, Khotun GM. 1965. The Skythian amulet. Archeologiya 19:118–121.

Wagner GA, Maul LCh, Löscher M, Schreiber HD. 2011. Mauer - the type site of *Homo heidelbergensis*: palaeoenvironment and age. Quaternary Science Reviews 30(11):1464–1473.

Walker M. 2001. Excavations at Cueva Negra del Estrecho del Rio Quipar and Sima de las Palomas del Cabezo Gordo: two sites in Murcia (south-east Spain) with Neanderthal skeletal remains, Mousterian assemblages and late Middle to early Upper Pleistocene fauna. In: Milliken S, Cook J. (Eds.), A very remote period indeed: papers on the Palaeolithic presented to Derek Roe. Oxbow Books, Oxford, pp 71–96.

Walker MJ, López-Martínez MV, Ortega-Rodrigáñez J, Haber-Uriarte M, López-Jiménez A, Avilés-Fernández A, Polo-Camacho JL, Campillo-Boj M, García-Torres J, Carrión-García JS, San Nicolás-del Toro M, Rodríguez-Estrella T. 2012. The excavation of buried articulated Neanderthal skeletons at Sima de las Palomas (Murcia, SE Spain). Quaternary International 259:7–21.

Wei L, Wu X, Jiang Z. 2009. The complete mitochondrial genome structure of snow leopard *Panthera uncia*. Molecular Biology Reports 36:871–878.

Werdelin L, Levis ME. 2005. Plio-Pleistocene Carnivora of eastern Africa: species richness and turnover patterns. Zoological Journal of the Linnean Society 144:121–144.

Werdelin L, Olsson L. 1997. How the leopard got its spots: a phylogenetic view of the evolution of felid coat patterns. Biological Journal of the Linnean Society 62(3):383–400.

Wettstein OV, Mühlhofer F. 1938. Die Fauna der Höhle von Merkenstein in N.Ö. Archiv für Naturgeschichte Neue Folge 7(4):514–558.

Woldřich JN. 1893. Reste diluvialer Faunen und des Menschen aus dem Waldviertel Niederösterreichs in den Sammlungen des kaiserlich-königlichen Naturhistorischen Hofmuseums in Wien. Denkschriften der kaiserlichen Akademie der Wissenschaften, Mathematisch-Naturwissenschaftliche Classe 60:565–634.

Yravedra J. 2010a. A taphonomic perspective on the origins of the faunal remains from Amalda Cave (Spain). Journal of Taphonomy 8(4):301–334.

Yravedra J. 2010b. Zooarqueología y tafonomía del yacimiento de Hornos de la Peña (San Felices de Buelna, Cantabria). Complutum 21(1):69–86.

Yu L, Zhang Y-P. 2005. Phylogenetic studies of pantherine cats (Felidae) based on multiple genes, with novel application of nuclear b-fibrinogen intron 7 to carnivores. Molecular Phylogenetics and Evolution 35(2):483–495.

Zhuravlev OP. 1981. The fauna of the settlement Chernomorka 2. In Bidzilya VI. (ed.). The application of methods of the natural sciences in archaeology. Naukova Dumka: Kiev, pp. 130–161.

Zhuravlev OP. 1983. Cattle-breeding, hunting and environmental characteristics of the antique Ol’biya state (on bone remains). In: Manzij SF. (Ed.), Morphological characteristics of the vertebrates in the Ukraine. Naukova Dumka, Kiev, pp. 38–45.

Zhuravlev OP. 1993. The history of the fauna and cattle-breeding in the lower Bug region in the antique period. PhD Thesis. Institute of Archeology of the Academy of Sciences of the Ukraine, Kiev.

Zhuravlev OP. 1999. Säugetierfauna und Umwelt am Südlichen Bug während der Antike. In: Benecke N. (red.): The Holocene history of the European vertebrate fauna. Modern aspects of research. Archäologie in Eurasien 6:389–398.

Zilhão J, Davis SJM, Duarte C, Soares AMM, Steier P, Wild E. 2010a. Pego do Diabo (Loures, Portugal): dating the emergence of anatomical modernity in westernmost Eurasia. Plos One 5(1):1–22.

Zilhão J, Angelucci DE, Argant J, Brugal JP, Carrión JS, Carvalho R, Fuentes N, Nabais M. 2010b. Humans and hyenas in the Middle Paleolithic of Gruta da Oliveira (Almonda System, Torres Novas, Portugal). Zona Arqueológica 13:298–309.

**TABLE S2**. List of taxa from Radochowska Cave.

| **Late Pleistocene (MIS 3)** | **Holocene (MIS 1)** |
| --- | --- |
| *Lepus europaeus* Pallas, 1778 | *Talpa europea* Linnaeus, 1758 |
| *Apodemus* sp. | *Myotis* sp. |
| *Arvicola amphibious* (Linnaeus, 1758) | *Myotis myotis* (Borkhausen, 1797) |
| *Myodes glareolus* (Schreber, 1780) | *Plecotus auratus* (Linnaeus, 1758) |
| *Cricetus cricetus* (Linnaeus, 1758) | *Rhinolophus hipposideros* (Bechstein, 1800) |
| *Microtus arvalis* (Pallas, 1778) | *Lepus europaeus* Pallas, 1778 |
| *Microtus* sp. | *Lepus* sp. |
| *Canis lupus spelaeus* Goldfuss, 1823 | *Oryctolagus cuniculus* (Linnaeus, 1758) |
| *Cuon alpinus europeaus* Bourguignat, 1868 | *Apodemus* sp. |
| *Vulpes lagopus* (Linnaeus, 1758) | *Arvicola amphibious* (Linnaeus, 1758) |
| *Ursus ingressus* Rabeder et al., 2004 | *Castor fiber* Linnaeus, 1758 |
| *Ursus arctos priscus* sensu lato | *Microtus arvalis* (Pallas, 1778) |
| *Gulo gulo* (Linnaeus, 1758) | *Myodes glareolus* (Schreber, 1780) |
| *Mustela eversmanii* (Lesson, 1827) | *Canis lupus lupus* (Linnaeus, 1758) |
| *Mustela erminea* Linnaeus, 1758 | *Vulpes vulpes* (Linnaeus, 1758) |
| *Mustela nivalis* Linnaeus, 1766 | *Ursus arctos arctos* Linnaeus, 1758 |
| *Panthera spelaea spelaea* (Goldfuss, 1810) | *Meles meles* (Linnaeus, 1758) |
| *Panthera pardus* (Linnaeus, 1758) | *Martes martes* (Linnaeus, 1758) |
| *Coelodonta antiquitatis* (Blumenbach, 1799) | *Mustela putorius* Linnaeus, 1758 |
| *Equus ferus* Boddaert, 1785 | *Mustela erminea* Linnaeus, 1758 |
| *Bison priscus* Bojanus, 1827 | *Mustela nivalis* Linnaeus, 1766 |
| *Bos primigenius* (Bojanus, 1827) | *Lynx lynx* (Linnaeus, 1758) |
| *Megaloceros giganteus* (Blumenbach, 1799) | *Felis silvestris* Schreber, 1777 |
|  | *Felis catus* Linnaeus, 1758 |
|  | *Alces alces* (Linnaeus, 1758) |
|  | *Cervus elaphus* Linnaeus, 1758 |
|  | *Capreolus capreolus* (Linnaeus, 1758) |
|  | *Bos primigenius* (Bojanus, 1827) |
|  | *Bos taurus* Linnaeus, 1758 |
|  | *Sus scrofa* Linnaeus, 1758 |
